# Supplementary material for: A robotic prebiotic chemist probes long term reactions of complexifying mixtures
Source: PubMed Central journal article supplement (PMC8192940; doi:10.1038/s41467-021-23828-z), 2021-06-10
Supplement: 41467_2021_23828_MOESM1_ESM.pdf [file 41467_2021_23828_MOESM1_ESM.pdf]

Supplementary Information for:

## A robotic prebiotic chemist probes long term reactions of complexifying

### mixtures

Silke Asche<sup>1</sup>, Geoffrey J. T. Cooper<sup>1</sup>, Graham Keenan<sup>1</sup>, Cole Mathis<sup>1</sup> and Leroy Cronin<sup>1\*</sup>

<sup>1</sup>*School of Chemistry, University of Glasgow, Joseph Black Building, University Avenue, Glasgow G12 8QQ, U.K.*

\*Corresponding author email: [lee.cronin@glasgow.ac.uk](mailto:lee.cronin@glasgow.ac.uk)

### Contents

|                                                                                               |                                     |
|-----------------------------------------------------------------------------------------------|-------------------------------------|
| <b>A robotic prebiotic chemist probes long term reactions of complexifying mixtures</b> ..... | <b>1</b>                            |
| 1 Hardware .....                                                                              | 3                                   |
| 2 Experimental Details .....                                                                  | 5                                   |
| 2.1 Dilution vs. product persistence .....                                                    | 5                                   |
| 2.2 Chemical selection process .....                                                          | 5                                   |
| 2.3 Mineral leaching .....                                                                    | 6                                   |
| 2.4 List of experiments .....                                                                 | 8                                   |
| 2.5 Instrumentation .....                                                                     | 10                                  |
| 2.5.1 Electrospray- Ionisation Mass Spectrometry (ESI-MS) .....                               | 10                                  |
| 3 Mass Index calculation .....                                                                | 11                                  |
| 3.1 Mass Index calculation .....                                                              | 11                                  |
| 3.2 Mass Index trends .....                                                                   | 11                                  |
| W .....                                                                                       | <b>Error! Bookmark not defined.</b> |
| 3.3 Mass Index calculation examples .....                                                     | 12                                  |
| 4 Example experimental data .....                                                             | 13                                  |
| 4.1 General .....                                                                             | 13                                  |
| 4.1.1 Input compositions used .....                                                           | 13                                  |
| 4.1.2 pH measurements .....                                                                   | 14                                  |
| 4.1.3 Mineral controls .....                                                                  | 15                                  |
| 4.1.4 HPLC-DAD data .....                                                                     | 17                                  |
| 4.1.5 Online HPLC-MS .....                                                                    | 19                                  |
| 4.1.6 Offline HPLC-ESI-MS .....                                                               | 19                                  |
| 4.2 Formula identification .....                                                              | 23                                  |
| 4.2.1 Experimentally found values .....                                                       | 23                                  |
| 4.2.2 Matching experimental and theoretical formulas .....                                    | 29                                  |

|       |                                        |    |
|-------|----------------------------------------|----|
| 4.2.3 | Product persistence over dilution..... | 30 |
| 5     | Decision Making Algorithm.....         | 31 |
| 5.1   | Architecture .....                     | 31 |
| 5.2   | Measure of complexity .....            | 32 |
| 5.3   | Decision making algorithm example..... | 33 |
| 5.4   | Alternative algorithms tested .....    | 34 |
| 5.4.1 | Adaptive Mass Index.....               | 34 |
| 5.4.2 | Weight by intensity index .....        | 38 |
| 5.4.3 | Information entropy value.....         | 40 |
| 6     | References .....                       | 43 |

## 1 Hardware

The automated platform system consists of four main elements: the input system, the reactor, the in-line sample system and the sample storage. All elements are run by a modular python code written in-house. As a schematic of the whole build up is shown in the manuscript as Figure 2, so here we only elaborate on specific elements of the setup.

The input system consists of three Tricontinent syringe pumps each connected to a Tricontinent rotary 6-way distribution valve. Every valve is connected to six starting material bottles, resulting in a library of 18 input choices. Liquid is transported through 1/8 (3.2 mm) PTFE tubing with PEEK fittings.

The reactor, is a 100 mL round bottom flask with a specifically tailored head allowing attachment of screw fittings for the tubing connections and a reflux condenser, which is kept under a positive pressure of nitrogen gas, controlled by a flow controller (model 0254 by Brooks Instrument), ensuring a controlled reaction atmosphere. The temperature is controlled via an IKA RET 'control-visc' hotplate with a USB interface.

For the in-line analytical system, shown in Supplementary Figure 1 below, an HPLC-DAD (diode array detector) system is coupled to an Advion L-series benchtop mass spectrometer.

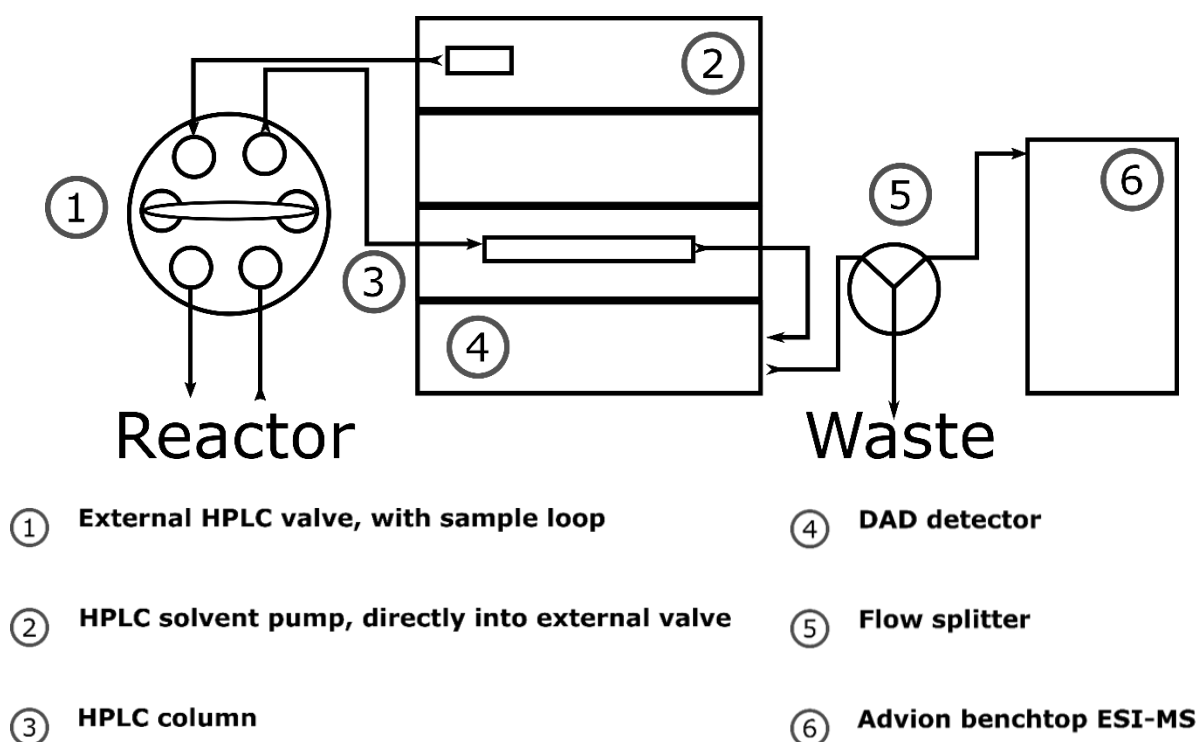

**Supplementary Figure 1:** In-line sampling and analytical system with external sample loop on the left, HPLC-DAD in the middle followed by a split valve, which injects into the ESI-MS on the right

The sample is drawn from the reactor by a peristaltic pump (Vapourtec model SF-10) and filtered through two 0.2  $\mu\text{m}$  size nylon syringe filters fitted between a pair of Luer (Male) and Flat Bottom (Female) ETFE/Polypropylene adapters. It is injected into a 16 cm sample loop on an external, directly controlled, HPLC six-port switching valve. The sampling is triggered through the python code and actuated through an Arduino Mega 2560/RAMPs combination. Once the loop is loaded with fresh sample, the external sample valve is switched to flush the loaded sample loop with mobile phase from the LC-system and deliver the sample directly on the column. After the column, the sample moves through the diode array detector (DAD) and then into a split valve, which reduces the flow from 0.5 mL/min to 0.2 mL/min (the excess going to waste) ready for direct injection into the electrospray ionisation mass spectrometer (ESI-MS). This is triggered through a contact closure from the HPLC system, ensuring no delay in the parallel run time of both instruments.

The sample storage system (Supplementary Figure 2), which allows the storage of up to 20 samples of 50mL each in plastic sampling tubes, is built around an in-house designed 3D printed wheel. This wheel is based in a Geneva drive mechanism motion, allowing step-by-step increment of positions with high accuracy. The box in which the wheel system is contained is built from custom cut V-Slot aluminium rails. The column to hold the driven wheel, the drive wheel that increments the driven wheel, the stepper motor securing element, the supporting levelling arches and the solution dispensing part are all 3D printed on a Connex 500 printer with the translucent material RGD720. The base plate and the vial plate for holding the 50 ml plastic sample tubes is laser cut from acrylic plate. The levelling arches are all suited with an 8 mm ball bearing, and the Nema11 stepper motor that increments the drive is controlled through an Arduino MEGA.

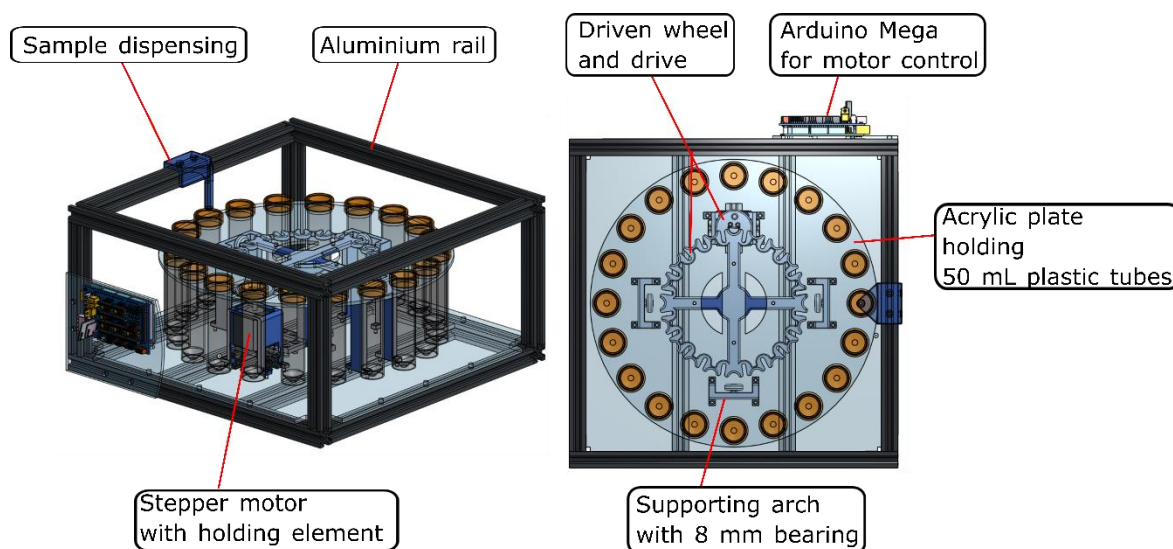

**Supplementary Figure 2:** Custom build sample storage system providing space for up to 20 samples of a volume of up to 50 mL per sample, which are collected in plastic centrifuge tubes. The lids of the tubes (orange), sit on the acrylic plate and are holding the vials in place. The 3d printed parts are shown in blue.

## 2 Experimental Details

### 2.1 Dilution vs. product persistence

In this study we are interested in the persistence of products, not of input reagents. If the experimental concept were linear and solely be based on periodically changing input compounds, every product would become diluted over time. However, our experimental concept is different, and with the inclusion of minerals, the reaction system is not linear. Over time, many of the components of the mixture will be diluted to infinitesimally low concentrations, but not all. Binding to mineral particles can lead to product build up on their surface which may then lead to species amplification, as well as a change of the species concentration in the reactor over time. Products in our system can be made from multiple reactions / input compositions, including the breakdown components of other product species, which can lead to some specific product species becoming prevalent, even under different input conditions. The critical question is therefore not about what will happen to the reagents upon serial dilution, but rather what products are formed and whether those products are formed robustly from the reaction mixture or only marginally. Those that are formed robustly (e.g. from multiple sets of reagent combinations) will persist (be amplified) in the face of dilution. When specific products persist through many reaction cycle, we say they have been amplified by the reaction, while all species that do not increase will be diluted out.

### 2.2 Chemical selection process

The starting material library was mostly chosen by purposefully avoiding specific chemical groups, meaning no “common” autocatalytic cycle precursors, sugars or amino acids have been selected. The aim was to solely concentrate on small functional building block molecules with no immediate connection or function. The following table shows the list of selected building blocks and some potential properties.

**Supplementary Table 1:** List of starting material reagents and their properties

| Input chemical                  | Properties                                                                                                                                                                       |
|---------------------------------|----------------------------------------------------------------------------------------------------------------------------------------------------------------------------------|
| Resorcinol                      | <ul style="list-style-type: none"><li>• weak organic acid</li><li>• can polymerize in condensation reactions</li></ul>                                                           |
| Pyruvic acid                    | <ul style="list-style-type: none"><li>• can be used to make glucose</li><li>• polymerizes and decomposes in touch with air</li></ul>                                             |
| Acrylic acid                    | <ul style="list-style-type: none"><li>• polymerizes exposed to heat</li></ul>                                                                                                    |
| Glycidol (2,3-epoxy-1-propanol) | <ul style="list-style-type: none"><li>• intermediate in the synthesis of glycerol, glycidyl ether, amines</li><li>• contact with earth metals may cause polymerization</li></ul> |
| Glycerol                        | <ul style="list-style-type: none"><li>• intermediate in carbohydrate and lipid metabolism</li></ul>                                                                              |
| Carbonyldiimidazole             | <ul style="list-style-type: none"><li>• enzyme cross linking agent</li><li>• coupling agent for amino acids and peptide synthesis</li></ul>                                      |
| Ethyl acetate                   | <ul style="list-style-type: none"><li>• carboxylic acid ester</li><li>• exists in eukaryotes</li></ul>                                                                           |
| Pyridine                        | <ul style="list-style-type: none"><li>• coordination chemistry ligand</li><li>• strong basic compound</li></ul>                                                                  |

|                                  |                                                                                                                      |
|----------------------------------|----------------------------------------------------------------------------------------------------------------------|
| Oxalic acid                      | <ul style="list-style-type: none"> <li>• metabolite</li> <li>• moderately acidic</li> </ul>                          |
| Formamide                        | <ul style="list-style-type: none"> <li>• monocarboxylic acid amide</li> <li>• nucleic acid building block</li> </ul> |
| Catechol                         | <ul style="list-style-type: none"> <li>• weak organic acid</li> <li>• participant in metabolic pathways</li> </ul>   |
| Ruthenium-(III)-chloride hydrate | <ul style="list-style-type: none"> <li>• metal salt</li> <li>• catalytic effects</li> </ul>                          |
| Formaldehyde                     | <ul style="list-style-type: none"> <li>• sugar precursor</li> <li>• Miller-Urey intermediate</li> </ul>              |
| Copper-(II)-sulfate pentahydrate | <ul style="list-style-type: none"> <li>• metal salt</li> </ul>                                                       |
| Sulfuric acid                    | <ul style="list-style-type: none"> <li>• strong acid</li> <li>• corrosive</li> </ul>                                 |
| Nitric acid                      | <ul style="list-style-type: none"> <li>• strong acid</li> <li>• corrosive</li> </ul>                                 |
| Ammonium thiosulfate             | <ul style="list-style-type: none"> <li>• ammonium source</li> <li>• sulphur part of earth crust</li> </ul>           |
| Potassium pyrophosphate          | <ul style="list-style-type: none"> <li>• potassium part of earth crust</li> <li>• phosphate source (food)</li> </ul> |

### 2.3 Mineral leaching

Details about the mineral preparation and wash procedure can be found in the manuscript. To look into the effect of minerals leaching out into solution, a preliminary experiment was analysed by ICP-OES, testing if the elements present in the mineral, can be found in solution.

The ICP-OES (Inductively Coupled Plasma – Optical Emission Spectroscopy) analysis was performed on an Agilent 5100. Multi-standard solutions have been used for calibration. The samples have been treated with a 2% HNO<sub>3</sub> solution.

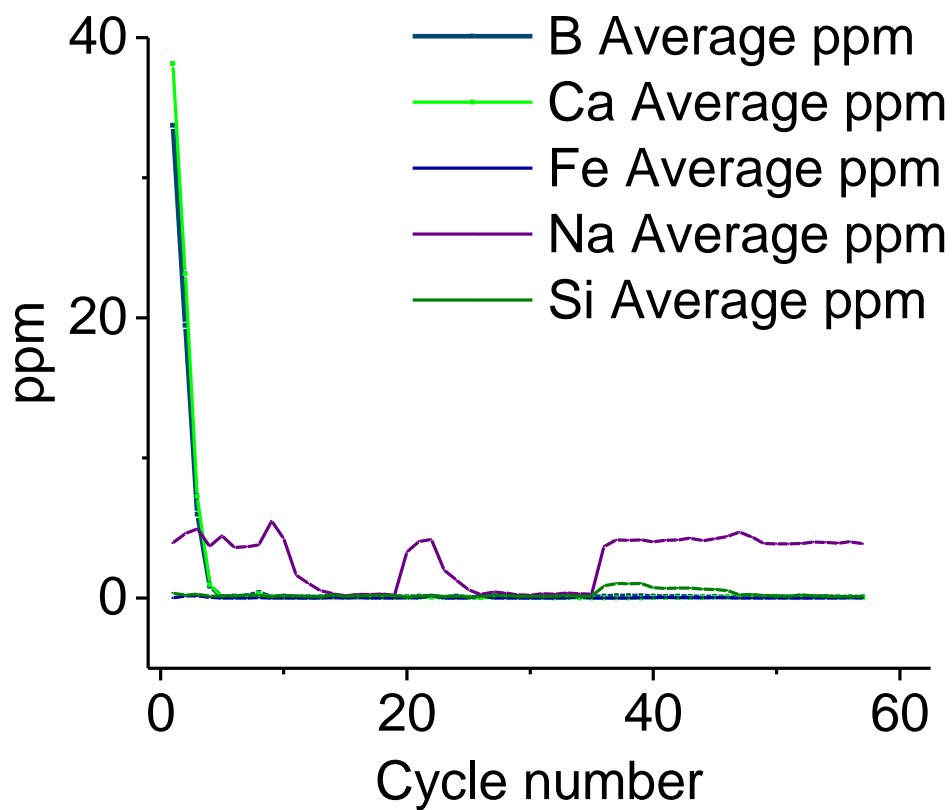

**Supplementary Figure 3:** ICP-OES plotted against the number of cycles. Boron, calcium, iron, sodium and silicon have been tested. The increase of sodium is based on input solution addition containing in the specific cycles.

The graph above shows, that it is possible for elements like calcium and boron to leach out of ulexite. This effect appears to be only present in the first 5 cycles, after which the concentration of these elements in solution drops to negligent amounts.

## 2.4 List of experiments

**Supplementary Table 2:** List of executed runs, their cycle number and their input solution in order of addition to the reactor. The run description specifically state the label used for the run in the SI, as well as figure 4 it and 5 of the main manuscript as labels have been changed for consistency and clarity.

| <b>RUN DESCRIPTION</b>                          | <b>CYCLE NUMBER</b> | <b>INPUT 1</b>                   | <b>INPUT 2</b>                   | <b>INPUT 3</b>                   |
|-------------------------------------------------|---------------------|----------------------------------|----------------------------------|----------------------------------|
| A IN SI                                         | 1 to 17             | resorcinol                       | pyruvic acid                     | ammonium thiosulfate             |
|                                                 | 18 to 26            | copper-(II)-sulfate pentahydrate | oxalic acid                      | nitric acid                      |
|                                                 | 27 to 36            | copper-(II)-sulfate pentahydrate | oxalic acid                      | carbonyldiimidazole              |
|                                                 | 37 to 47            | pyridine                         | ruthenium-(III)-chloride hydrate | ammonium thiosulfate             |
|                                                 | 48 to 59            | pyruvic acid                     | resorcinol                       | catechol                         |
|                                                 | 60 to 78            | ammonium thiosulfate             | carbonyldiimidazole              | formamide                        |
|                                                 | 79 to 88            | pyruvic acid                     | formaldehyde                     | glycidol                         |
|                                                 | 89 to 98            | formaldehyde                     | acrylic acid                     | sulfuric acid                    |
|                                                 | 99 to 110           | carbonyldiimidazole              | pyridine                         | ruthenium-(III)-chloride hydrate |
|                                                 | 111 to 113          | ruthenium-(III)-chloride hydrate | sulfuric acid                    | ethyl acetate                    |
| B IN SI<br>A IN FIGURE 4<br>10 IN FIGURE 5      | 1 to 17             | acrylic acid                     | potassium pyrophosphate          | carbonyldiimidazole              |
|                                                 | 18 to 42            | ethyl acetate                    | formamide                        | formaldehyde                     |
|                                                 | 43 to 52            | ruthenium-(III)-chloride hydrate | pyridine                         | copper-(II)-sulfate pentahydrate |
|                                                 | 53 to 62            | resorcinol                       | pyridine                         | formamide                        |
|                                                 | 63 to 67            | potassium pyrophosphate          | ethyl acetate                    | formaldehyde                     |
| C IN SI<br>11 IN FIGURE 5<br>REPEAT OF<br>RUN B | 1 to 17             | acrylic acid                     | potassium pyrophosphate          | carbonyldiimidazole              |
|                                                 | 18 to 42            | ethyl acetate                    | formamide                        | formaldehyde                     |
|                                                 | 43 to 52            | ruthenium-(III)-chloride hydrate | pyridine                         | copper-(II)-sulfate pentahydrate |
|                                                 | 53 to 62            | resorcinol                       | pyridine                         | formamide                        |
|                                                 | 63 to 67            | potassium pyrophosphate          | ethyl acetate                    | formaldehyde                     |



|                                                                  |                          |                                      |                            |                                     |               |
|------------------------------------------------------------------|--------------------------|--------------------------------------|----------------------------|-------------------------------------|---------------|
| D IN SI<br>B IN FIGURE 4<br>12 IN FIGURE 5<br>REPEAT OF<br>RUN B | 1 to 17                  | acrylic acid                         | potassium<br>pyrophosphate | carbonyldiimidazole                 |               |
|                                                                  | 18 to 42                 | ethyl acetate                        | formamide                  | formaldehyde                        |               |
|                                                                  | 43 to 52                 | ruthenium-(III)-<br>chloride hydrate | pyridine                   | copper-(II)-sulfate<br>pentahydrate |               |
|                                                                  | 53 to 62                 | resorcinol                           | pyridine                   | formamide                           |               |
|                                                                  | 63 to 67                 | potassium<br>pyrophosphate           | ethyl acetate              | formaldehyde                        |               |
| E IN SI<br>C IN FIGURE 4                                         | 1 to 13                  | glycidol                             | pyruvic acid               | sulfuric acid                       |               |
|                                                                  | 14 to 20                 | glycidol                             | resorcinol                 | catechol                            |               |
|                                                                  | 21 to 30                 | oxalic acid                          | sulfuric acid              | acrylic acid                        |               |
|                                                                  | 31 to 43                 | sulfuric acid                        | potassium<br>pyrophosphate | acrylic acid                        |               |
|                                                                  | 44 to 52                 | oxalic acid                          | formaldehyde               | sulfuric acid                       |               |
|                                                                  | 53 to 70                 | acrylic acid                         | pyridine                   | sulfuric acid                       |               |
|                                                                  | 71 to 80                 | ammonium<br>thiosulfate              | oxalic acid                | sulfuric acid                       |               |
|                                                                  | 81 to 92                 | ruthenium-(III)-<br>chloride hydrate | carbonyldiimidazole        | formamide                           |               |
|                                                                  | 93 to 100                | ruthenium-(III)-<br>chloride hydrate | potassium<br>pyrophosphate | ethyl acetate                       |               |
|                                                                  | 101 to 112               | nitric acid                          | oxalic acid                | sulfuric acid                       |               |
|                                                                  | 113 to 125               | ruthenium-(III)-<br>chloride hydrate | potassium<br>pyrophosphate | ruthenium-(III)-chloride<br>hydrate |               |
|                                                                  | 126 to 129               | ruthenium-(III)-<br>chloride hydrate | potassium<br>pyrophosphate | catechol                            |               |
|                                                                  | 130 to 160               | ruthenium-(III)-<br>chloride hydrate | potassium<br>pyrophosphate | resorcinol                          |               |
|                                                                  | F IN SI<br>D IN FIGURE 4 | 1 to 1                               | pyruvic acid               | ethyl acetate                       | oxalic acid   |
|                                                                  |                          | 13 to 20                             | acrylic acid               | copper-(II)-sulfate<br>pentahydrate | sulfuric acid |
| 21 to 43                                                         |                          | glycidol                             | carbonyldiimidazole        | oxalic acid                         |               |
| 44 to 56                                                         |                          | ethyl acetate                        | pyruvic acid               | ethyl acetate                       |               |
| 57 to 71                                                         |                          | copper-(II)-sulfate<br>pentahydrate  | acrylic acid               | glycidol                            |               |
| G IN SI<br>E IN FIGURE 4                                         | 1 to 10                  | oxalic acid                          | pyridine                   | catechol                            |               |
|                                                                  | 11 to 21                 | catechol                             | nitric acid                | pyruvic acid                        |               |

|                          |          |                                     |                                     |                      |
|--------------------------|----------|-------------------------------------|-------------------------------------|----------------------|
|                          | 22 to 34 | glycerol                            | ammonium thiosulfate                | formamide            |
|                          | 35 to 44 | acrylic acid                        | potassium<br>pyrophosphate          | glycidol             |
|                          | 45 to 56 | copper-(II)-sulfate<br>pentahydrate | sulfuric acid                       | ammonium thiosulfate |
|                          | 57 to 67 | glycerol                            | ammonium thiosulfate                | catechol             |
| H IN SI<br>F IN FIGURE 4 | 68 to 76 | glycidol                            | pyridine                            | pyruvic acid         |
|                          | 1 to 12  | glycidol                            | ammonium thiosulfate                | carbonyldimidazole   |
|                          | 13 to 22 | glycidol                            | formaldehyde                        | glycidol             |
|                          | 23 to 36 | ammonium<br>thiosulfate             | copper-(II)-sulfate<br>pentahydrate | catechol             |
|                          | 37 to 65 | sulfuric acid                       | resorcinol                          | pyruvic acid         |
|                          | 66 to 80 | sulfuric acid                       | ruthenium-(III)-chloride<br>hydrate | carbonyldiimidazole  |
|                          | 81 to 90 | oxalic acid                         | glycerol                            | resorcinol           |
|                          | 91 to 96 | potassium<br>pyrophosphate          | catechol                            | resorcinol           |

## 2.5 Instrumentation

### 2.5.1 Electrospray- Ionisation Mass Spectrometry (ESI-MS)

The Bruker Maxis was used for offline analysis. Data is shown in the SI in Figure 11 to 16. The sample was run through a DIONEX Ultimate 3000 series HPLC-DAD set up with a RS (rapid separation) pump. Injected from the RS autosampler (WPS-3000 (T) RS) on an Agilent Infinity Lab Poroshell 120 Eclipse EC-C18 UHPLC 150 mm column, kept in a column compartment (TCC-3000SD) with a controlled temperature of 30 °C. The method used was a gradient method with 0.1 % formic acid added to LC-MS grade water and 0.1 % formic acid added to LC-MS grade acetonitrile (MeCN). The run started with 100 % aqueous phase. Over 4 minutes, the organic (MeCN) flow was increased to 10 %, after another 12 minutes it was at 70% MeCN. After 19 minutes runtime, a flow of 100 % organic mobile phase was reached. After that, the mobile phase was switched back to the initial 100 % water. The flow rate through the whole run was 0.7 mL/min and the total runtime was 26 minutes. The HPLC was connected to a Bruker MaXis Impact quadrupole time-of-flight mass spectrometer with an electrospray source, operating exclusively in positive mode. The instrument was calibrated with a sodium formate standard solution before each run. Samples were introduced into the MS at a dry gas temperature of 220 °C. The ion polarity for all MS scans recorded was positive, with the voltage of the capillary tip set at 4800 V, end plate offset at – 500 V, funnel 1 RF at 400 Vpp, funnel 2 RF at 400 Vpp, hexapole RF at 100 Vpp, ion energy 5.0 eV, collision energy at 5 eV, collision cell RF at 200 Vpp, transfer time at 100.0 µs, and

the pre-pulse storage time at 3.0  $\mu$ s. The mass range was set to 50 – 2000 m/z. Data was analysed using the Bruker DataAnalysis v4.1 software suite.

### 3 Mass Index calculation

#### 3.1 Mass Index calculation

The Mass Index is calculated as shown in Supplementary Figure 4. Additional example cases of specific cycles are shown below in **Error! Reference source not found.** to 7.

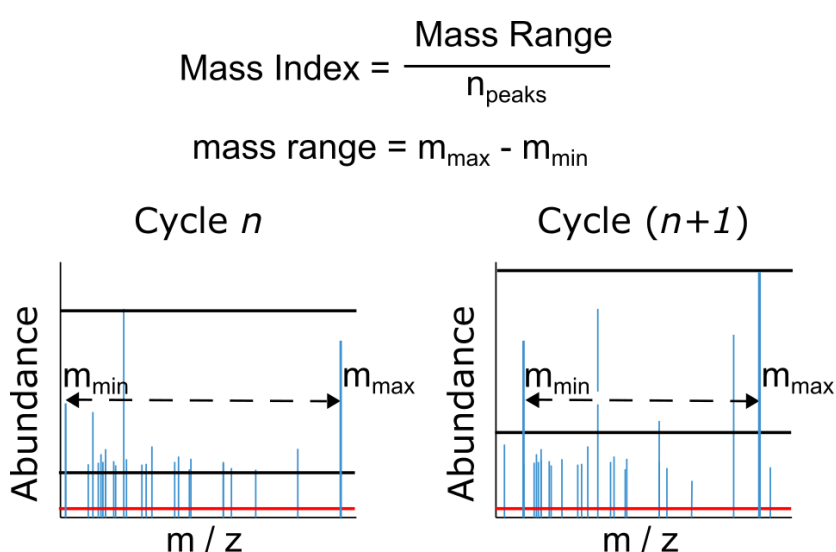

**Supplementary Figure 4:** Figure from Doran's paper(1), showing the Mass Index calculation. After thresholding(  $10^6$  intensity), the heaviest and lightest peak are subtracted from each other to determine the mass range and divided through the number of peaks over threshold.

#### 3.2 Mass Index trends

This table summarizes the expected behavior of the Mass Index in various cases.

**Supplementary Table 3:** Table depicting mass index trends

|                 |                          |                                 |
|-----------------|--------------------------|---------------------------------|
|                 | Largest Product Constant | Number Product Species Constant |
| Mass Index UP   | Fewer Product Species    | Largest Product Increased       |
| Mass Index DOWN | More Product Species     | Largest Product decreased       |

### 3.3 Mass Index calculation examples

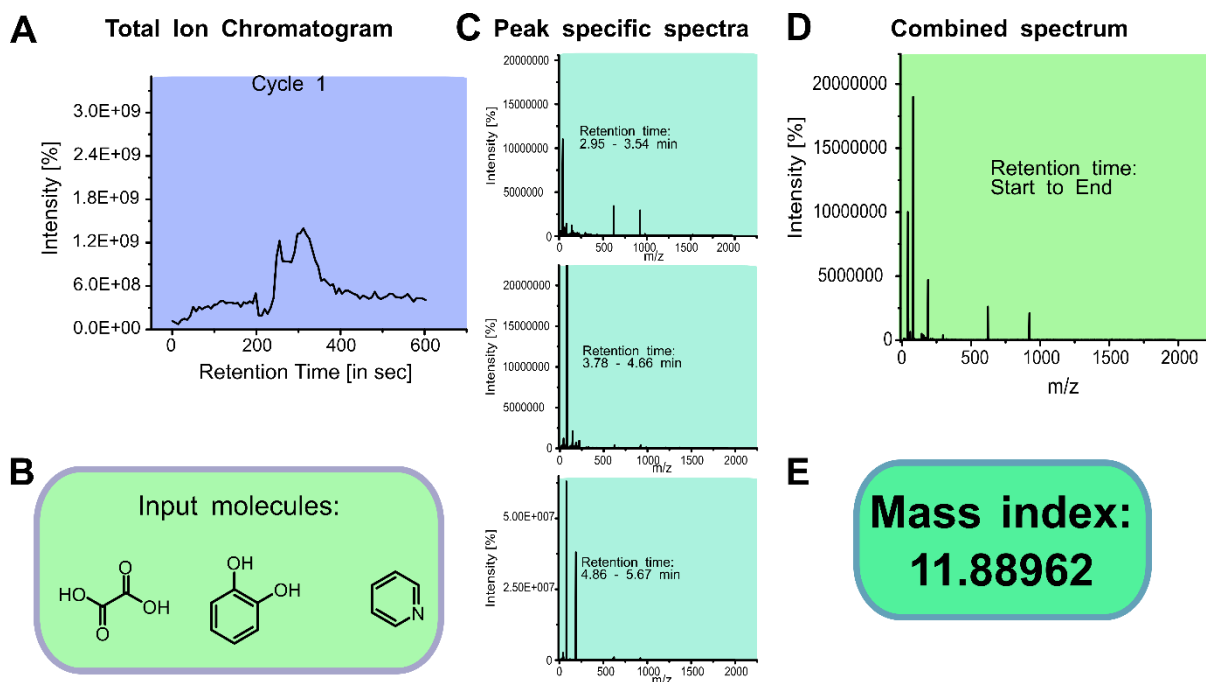

**Supplementary Figure 5:** Mass Index calculation of cycle 1, the Mass Index is calculated from the sum of all spectra. A presents the TIC of that cycle while B shows the input molecules which have been randomly chosen by the algorithm. In C spectra correlating to peak areas in the TIC are presented. D are all spectra from the TIC combined and this results in E the Mass Index of cycle 1.

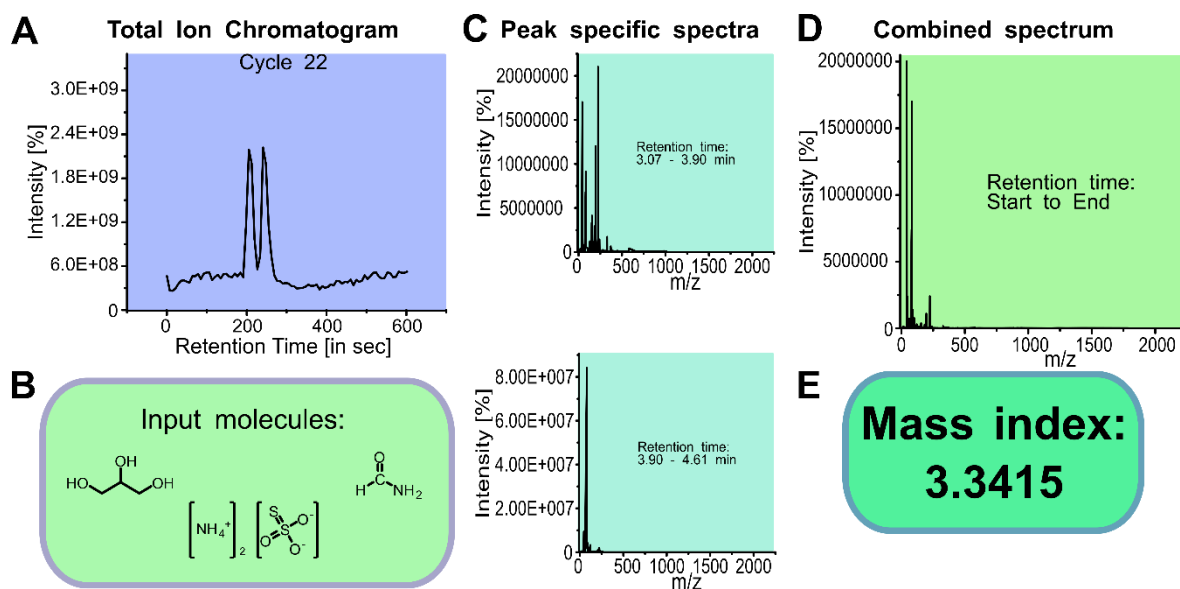

**Supplementary Figure 6:** Mass Index calculation of cycle 22, the Mass Index is calculated from the sum of all spectra. A presents the TIC of that cycle while B shows the input molecules which have been randomly chosen by the algorithm. In C spectra correlating to peak areas in the TIC are presented. D are all spectra from the TIC combined and this results in E the Mass Index of cycle 22.

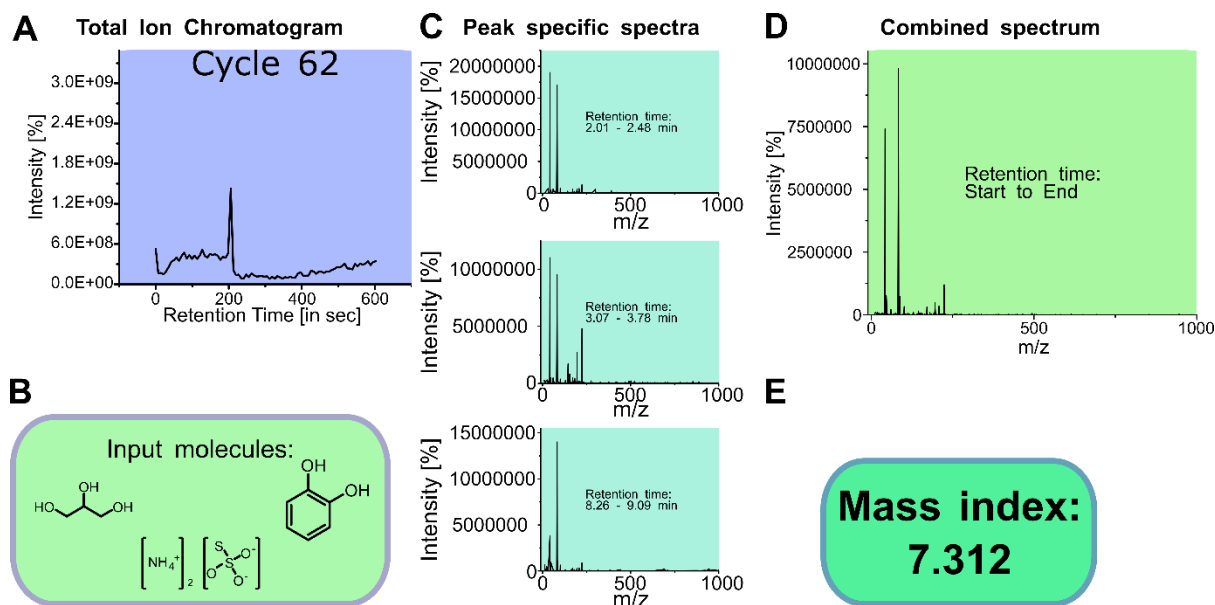

**Supplementary Figure 7:** Mass Index calculation of cycle 62, the Mass Index is calculated from the sum of all spectra. A presents the TIC of that cycle while B shows the input molecules which have been randomly chosen by the algorithm. In C spectra correlating to peak areas in the TIC are presented. D are all spectra from the TIC combined and this results in E the Mass Index of cycle 62.

## 4 Example experimental data

### 4.1 General

All data was collected as described above. As the size of the datasets (over 1000 samples have been collected) do not allow to present every single sample, we show one experiment in detail, as an example for all experiments discussed in the manuscript. This data analysis was complementary, as the main focus of the project was to algorithmically analyse and systematically investigate the experiment instead of screening for every single species which could be found in the analysis. The experiment which was chosen as the example here is referred as Run G in the manuscript.

#### 4.1.1 Input compositions used

**Supplementary Table 4:** Input solutions, used in Run G. All inputs have been added in the order 1 to 3.

| Cycle number | Input 1     | Input 2     | Input 3      |
|--------------|-------------|-------------|--------------|
| 1-10         | Oxalic acid | Pyridine    | Catechol     |
| 11 - 21      | Catechol    | Nitric acid | Pyruvic acid |

|                |                |                         |                      |
|----------------|----------------|-------------------------|----------------------|
| <b>22-34</b>   | Glycerol       | Ammonium thiosulfate    | Formamide            |
| <b>35-44</b>   | Acrylic acid   | Potassium pyrophosphate | Glycidol             |
| <b>45 - 56</b> | Copper sulfate | Sulfuric acid           | Ammonium thiosulfate |
| <b>57- 67</b>  | Glycerol       | Ammonium thiosulfate    | Catechol             |
| <b>68-75</b>   | Glycidol       | Pyridine                | Pyruvic acid         |

#### 4.1.2 pH measurements

**Supplementary Table 5:** pH values of run G per cycle. Measurement was carried out after the experiment was finished.

| <b>Cycle number</b> | <b>pH</b> | <b>Cycle number</b> | <b>pH</b> | <b>Cycle number</b> | <b>pH</b> |
|---------------------|-----------|---------------------|-----------|---------------------|-----------|
| <b>1</b>            | 7.90      | <b>24</b>           | 6.26      | <b>47</b>           | 3.55      |
| <b>2</b>            | 4.80      | <b>25</b>           | 6.26      | <b>48</b>           | 3.35      |
| <b>3</b>            | 3.87      | <b>26</b>           | 6.19      | <b>49</b>           | 3.35      |
| <b>4</b>            | 3.33      | <b>27</b>           | 6.18      | <b>50</b>           | 3.30      |
| <b>5</b>            | 3.05      | <b>28</b>           | 6.10      | <b>51</b>           | 3.52      |
| <b>6</b>            | 5.71      | <b>29</b>           | 6.11      | <b>52</b>           | 3.71      |
| <b>7</b>            | 4.78      | <b>30</b>           | 6.02      | <b>53</b>           | 3.83      |
| <b>8</b>            | 2.45      | <b>31</b>           | 6.04      | <b>54</b>           | 3.85      |
| <b>9</b>            | 2.67      | <b>32</b>           | 6.01      | <b>55</b>           | 4.05      |
| <b>10</b>           | 2.82      | <b>33</b>           | 6.01      | <b>56</b>           | 4.32      |
| <b>11</b>           | 2.44      | <b>34</b>           | 6.01      | <b>57</b>           | 4.48      |
| <b>12</b>           | 2.08      | <b>35</b>           | 5.95      | <b>58</b>           | 4.50      |
| <b>13</b>           | 2.89      | <b>36</b>           | 5.93      | <b>59</b>           | 4.79      |
| <b>14</b>           | 1.83      | <b>37</b>           | 5.91      | <b>60</b>           | 4.91      |
| <b>15</b>           | 1.81      | <b>38</b>           | 5.91      | <b>61</b>           | 5.01      |
| <b>16</b>           | 1.83      | <b>39</b>           | 5.86      | <b>62</b>           | 4.98      |
| <b>17</b>           | 1.84      | <b>40</b>           | 5.84      | <b>63</b>           | 5.00      |
| <b>18</b>           | 1.81      | <b>41</b>           | 5.09      | <b>64</b>           | 5.05      |
| <b>19</b>           | 3.90      | <b>42</b>           | 5.11      | <b>65</b>           | 5.05      |
| <b>20</b>           | 6.49      | <b>43</b>           | 4.88      | <b>66</b>           | 5.04      |
| <b>21</b>           | 4.52      | <b>44</b>           | 4.70      | <b>67</b>           | 5.07      |
| <b>22</b>           | 6.47      | <b>45</b>           | 3.69      | <b>68</b>           | 5.06      |
| <b>23</b>           | 6.37      | <b>46</b>           | 3.64      | <b>69</b>           | 5.07      |

### 4.1.3 Mineral controls

To control the influence of minerals of the experiment, cycles of run G have been manually repeated with and without minerals added.

The experiment has been carried out in 24-hour cycles but based on run G. The first test was the first input set of run G (as described in 4.1) recurred every 24 hours with and without minerals. For the second test, the composition of the replenishing input material was changed in every cycle, e.g. the first input set which was oxalic acid, pyridine and catechol in the first cycle and the second input set catechol, nitric acid and pyruvic acid followed by the third again based on the next input set of run G. This was as well done with and without minerals. The third test have been minerals stirred in water, in which the water was samples and replenished every 24 hours. All experiments have been carried out in triplicates and been measured via ESI-MS as described in 2.5.1. The minerals have been a mix of ulexite, pyrite and quartz each.

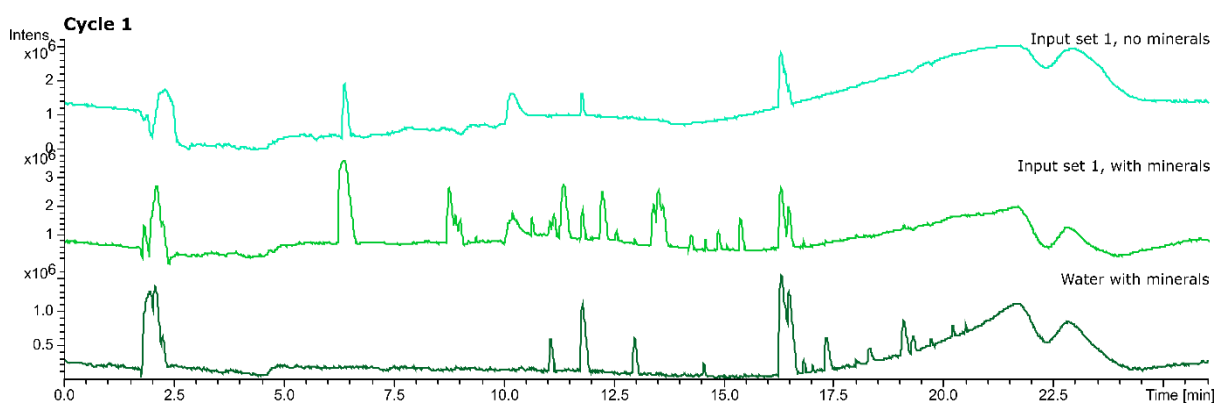

**Supplementary Figure 8:** Base Peak Chromatograms (BPC's) of Cycle 1 of the mineral control run. The graphs top to bottom are 1. The first input composition without minerals, 2. The same input composition with minerals and 3. Water with minerals.

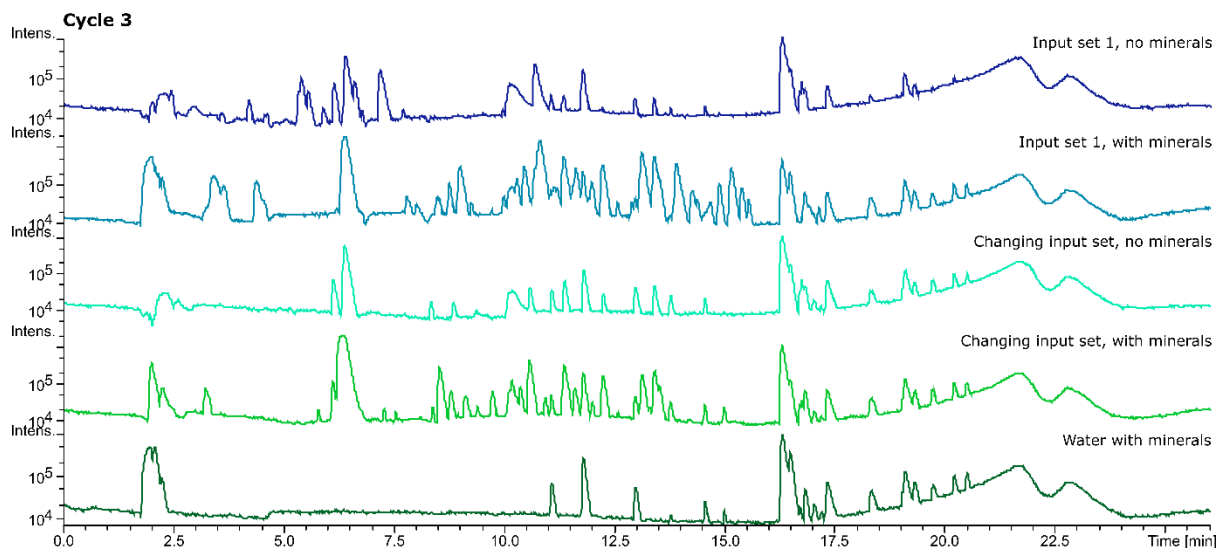

**Supplementary Figure 9:** BPC's of Cycle 3 of the mineral control run. The graphs top to bottom are 1. The first input composition replenished with the same input set without minerals, 2. The same input composition with minerals and 3. The first 3 input compositions added cycle per cycle, without minerals. 4. The same chemical combination as three, with minerals. 5. Water with minerals.

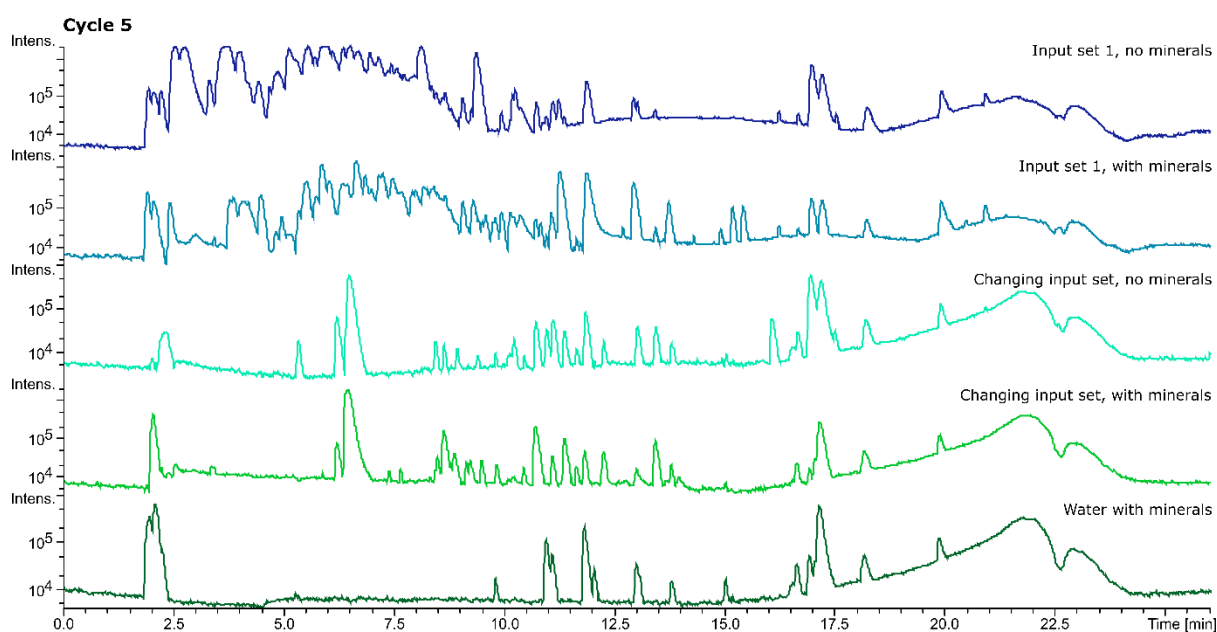

**Supplementary Figure 10:** BPC's of Cycle 5 of the mineral control run. The graphs top to bottom are 1. The first input composition replenished with the same input set without minerals, 2. The same input composition with minerals and 3. The first 5 input compositions added cycle per cycle, without minerals. 4. The same chemical combination as three, with minerals. 5. Water with minerals.



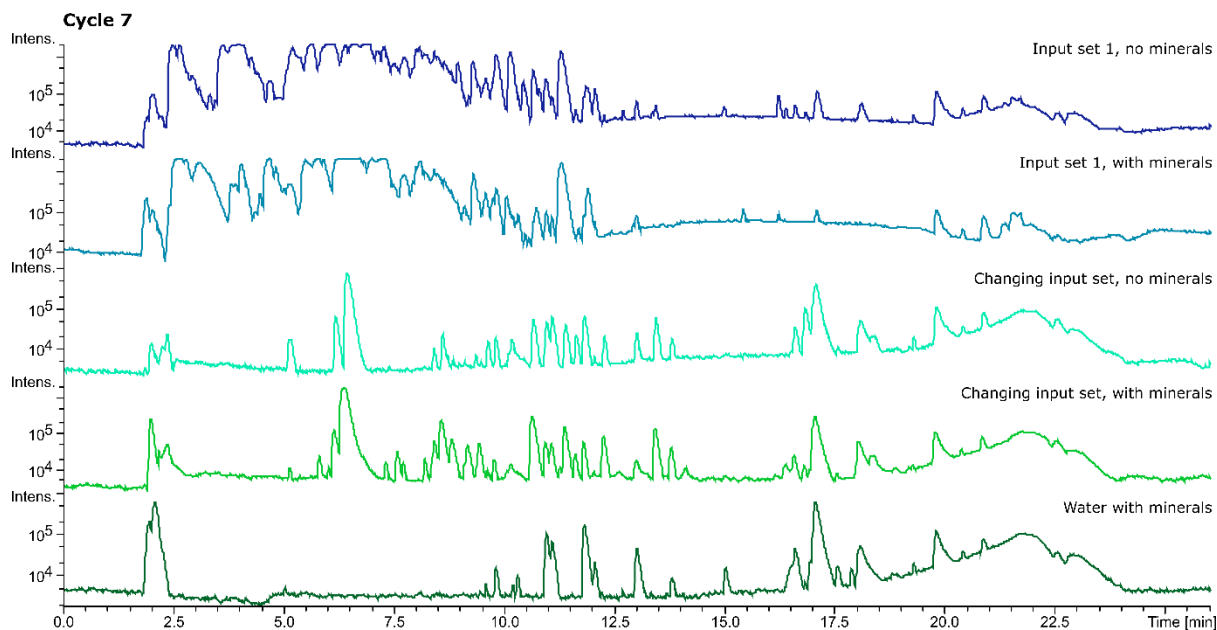

**Supplementary Figure 11:** BPC's of Cycle 7 of the mineral control run. The graphs top to bottom are 1. The first input composition replenished with the same input set without minerals, 2. The same input composition with minerals and 3. All input compositions of run G added cycle per cycle, without minerals. 4. The same chemical combination as three, with minerals. 5. Water with minerals.

#### 4.1.4 HPLC-DAD data

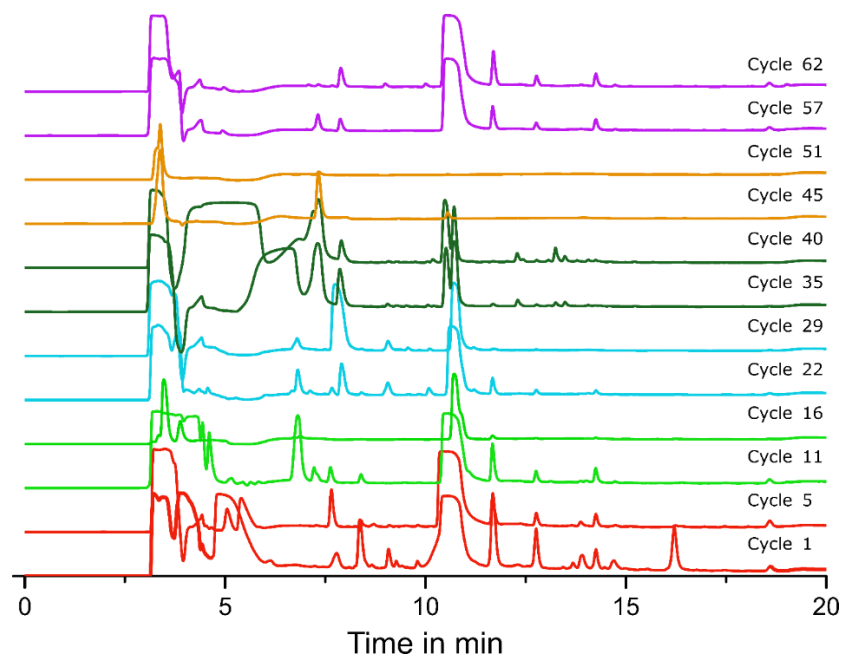

**Supplementary Figure 12:** HPLC-DAD run overview of Run G. Presented wavelength is 215 nm. The line colour is showing how the different cycles are in context to each other. The cycles with the same line colour, had the identical input sets. The different input sets were: Cycle 1 and 5 (oxalic acid, pyridine, catechol) (red), cycle 11 and 16 (catechol, nitric acid, pyruvic acid) (light green), cycle 22 and

29, (glycerol, ammonium thiosulfate, formamide) (blue), cycle 35 to 40 (glycidol, carbonyldiimidazole, oxalic acid) (dark green), cycle 45 and 51 (ethyl acetate, pyruvic acid, ethyl acetate) (orange), cycle 57 and 62 (copper-(II)-sulfate pentahydrate, acrylic acid, glycidol) (purple)

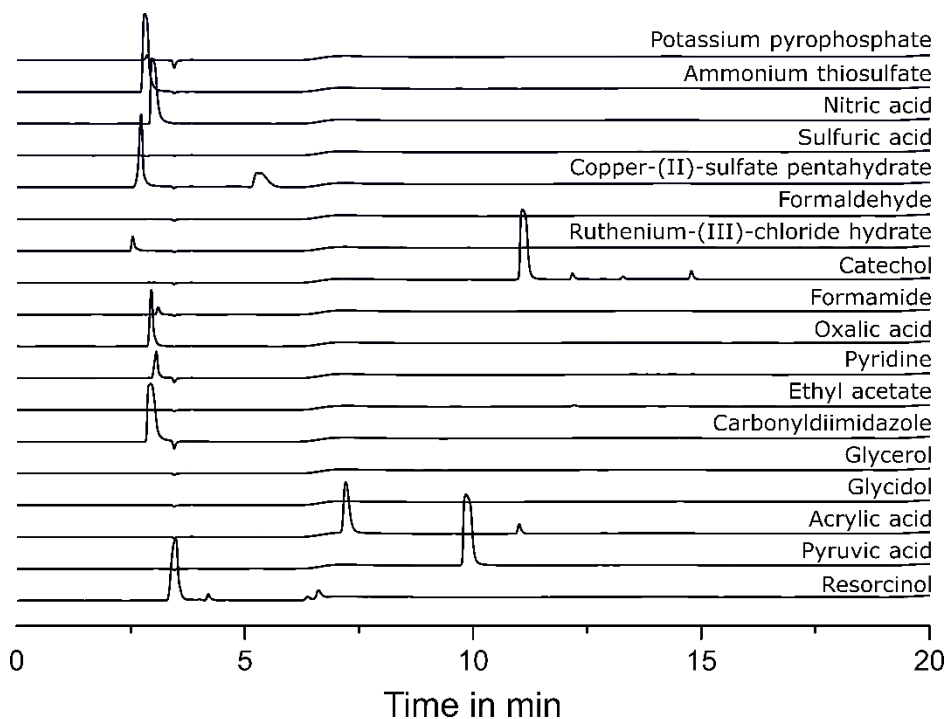

**Supplementary Figure 13:** Input solutions run in isolation on the HPLC-DAD. All solutions have been exactly prepared as if they have been used as inputs on the platform.

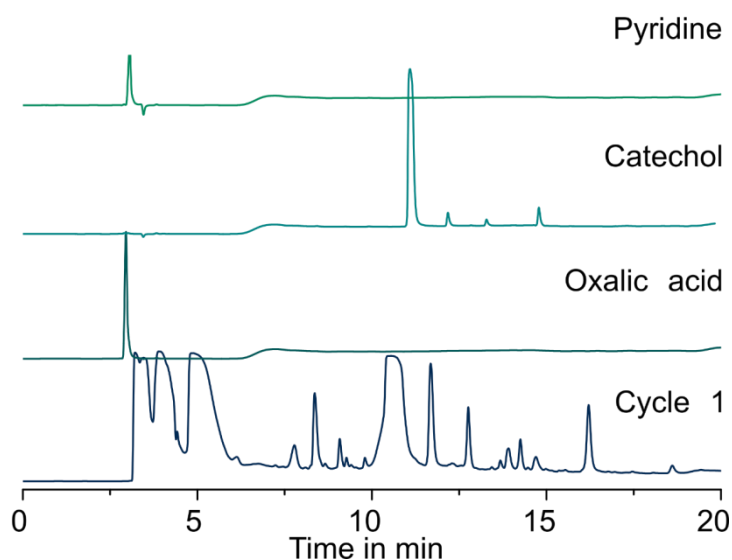

**Supplementary Figure 14:** Run G cycle 1 compared to the input solutions used in this cycle (oxalic acid, catechol, and pyridine). All standards have been run individual through the same HPLC-DAD.

#### 4.1.5 Online HPLC-MS

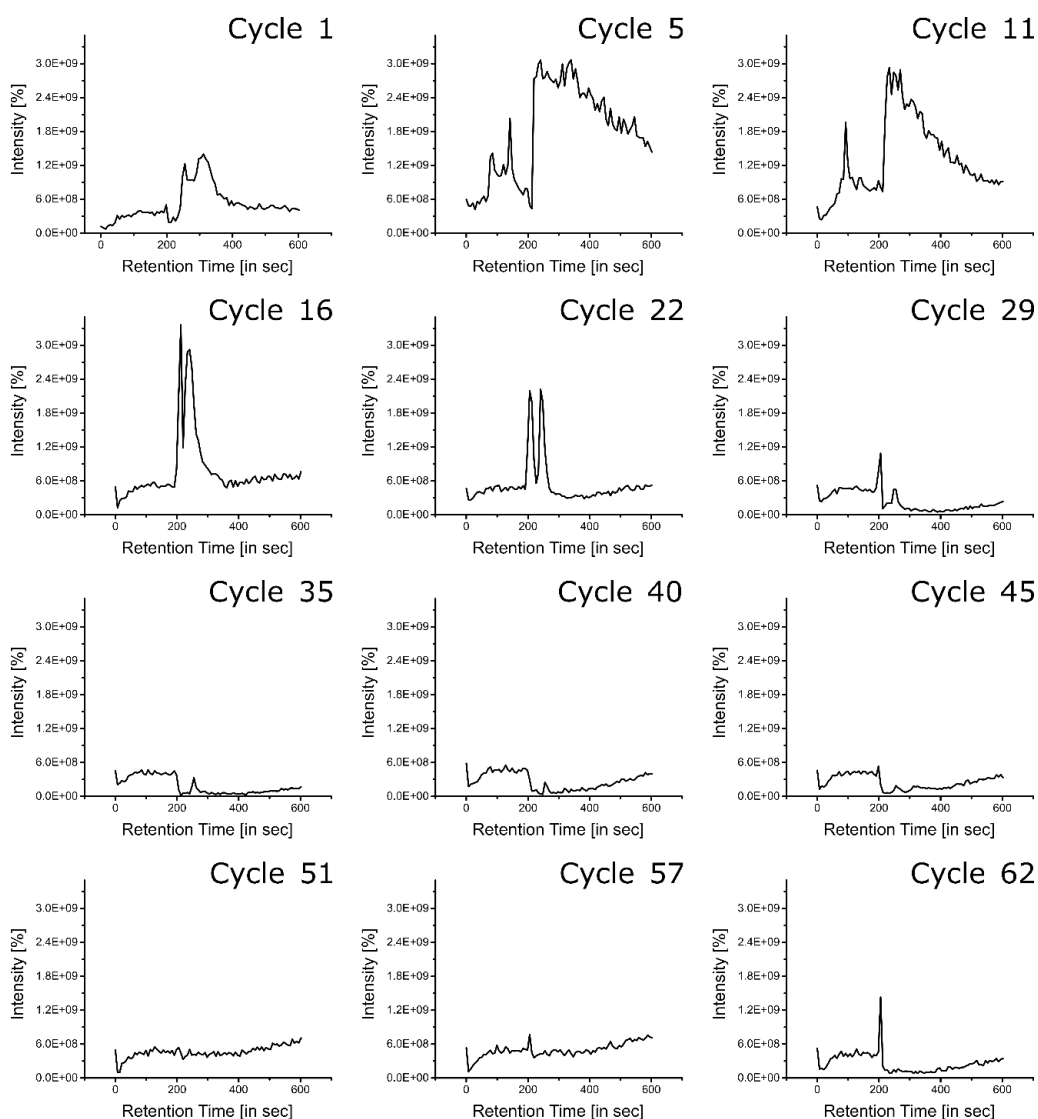

**Supplementary Figure 15:** Total ion chromatograms of run G from benchtop Advion. The plot shows the intensity of the total signal over the retention time in seconds.

#### 4.1.6 Offline HPLC-ESI-MS

In the following section, we show run G measured on a more sensitive mass spectrometer, a Bruker MAXIS. As we emphasised before, it is not the goal of these experiments to identify every single species but following we show an example approach which could be used for this. However, as this would be too time consuming in reality, does not present a real option.

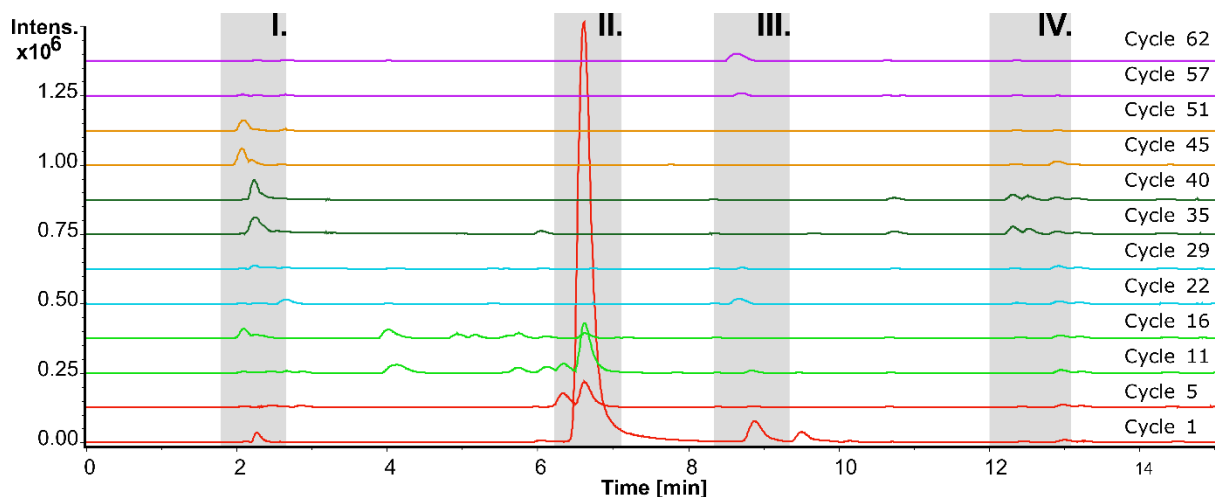

**Supplementary Figure 16:** BPC chromatograms of offline samples measured on Bruker mass spec compared to each other. The grey areas will be further discussed below.

Many small peaks can be observed in the Bruker BPC. Four retention times are highlighted in grey and are further investigated.

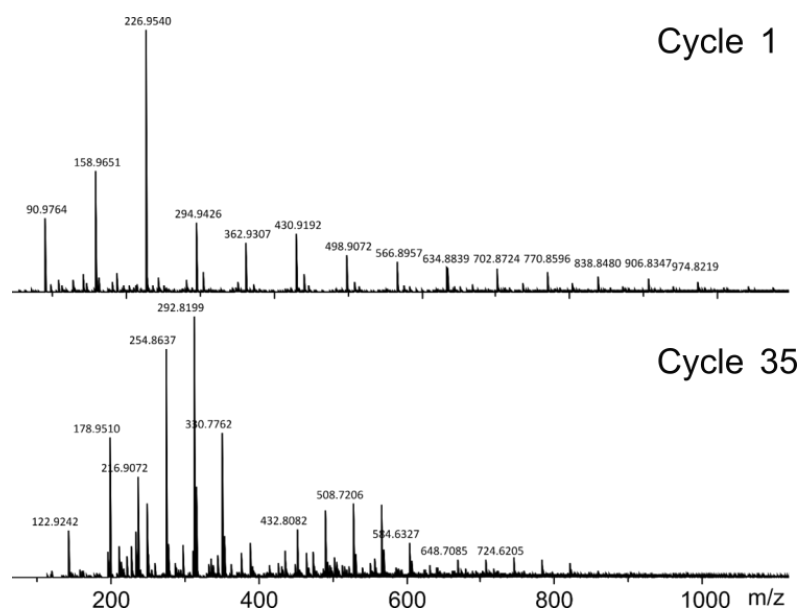

**Supplementary Figure 17:** Spectra of Bruker chromatogram, cycle 1 and cycle 35 compared in the range from 2.2 to 2.5 minutes, section I of Figure 11. The first peak at 90.97 m/z refers to the oxalic acid of that input set, the higher numbered species might be polymers or products that clustered together.

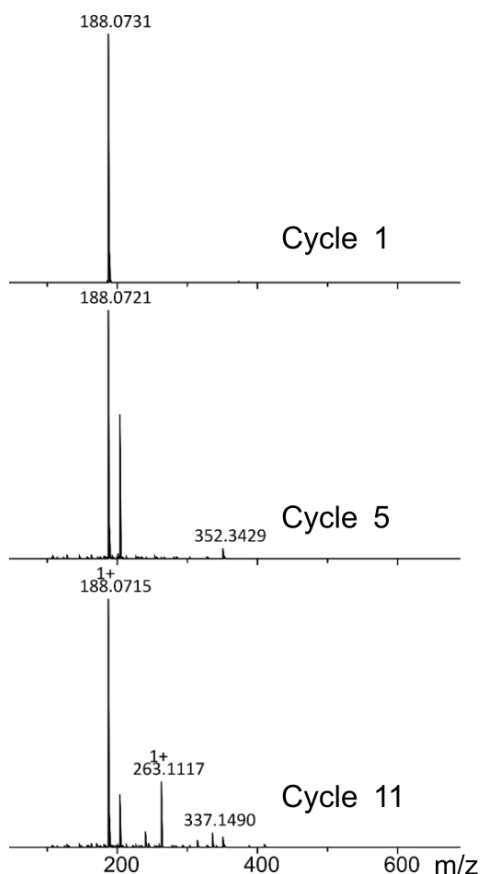

**Supplementary Figure 18:** Spectra of chromatogram range from 6.5 to 7.2 minutes, section II of Figure 11.

The observed mass of 188.0731 m/z would be consistent with a species with the formula  $C_{11}H_{10}NO_2$  and could lead to the hypothesis, that a pyridine molecule reacted with a catechol molecule in a condensation reaction. This reaction appears structurally and energetically very unlikely but the mass spectrometry data confirms the calculated formula. We observe a base peak with the mass of 188.0731 m/z and based on the suggested formula the theoretical mass would be 188.0716 m/z. This means the error is 10.315 ppm. Further to this, when zoomed into the spectra, another peak of an abundance of 12.5 % can be observed (Supplementary Figure 19: Spectra of chromatogram range from 6.5 to 7.2 minutes of cycle 1, zoomed in the m/z area between 187 m/z to 190 m/z). This peak at 189.0759 m/z supports the suggested formula, matching the second theoretical most abundant value, with a theoretical abundance of 11.9 % and a value of 189.07452 m/z, resulting in an error of 7.299 ppm. Both errors are low, suggesting that the data is good for the instrument used. As in cycle 1 there is just one peak visible in the shown mass range, while in cycle 5 there are 2 other peaks appearing, one very close to the first one at 204.06 m/z and one peak at 352.34 m/z. Cycle 11 shows more peaks but the 188.07 m/z peak is still standing out and the small peak at 204.06 m/z from cycle 5 is present too. Two new peaks are shown at 263.11 m/z and 337.15 m/z. Neither of the mentioned peaks are matching the mass of any of the starting materials what leads to the conclusion that these peaks relate to products.

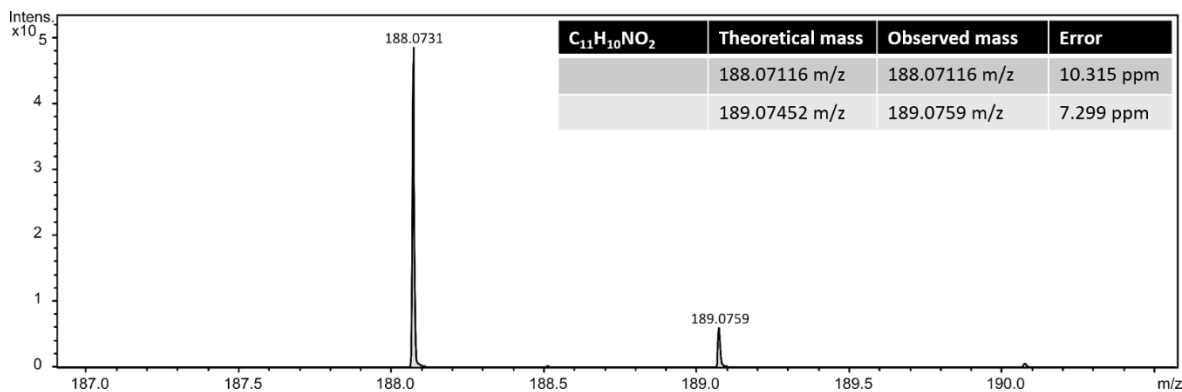

**Supplementary Figure 19:** Spectra of chromatogram range from 6.5 to 7.2 minutes of cycle 1, zoomed in the m/z area between 187 m/z to 190 m/z

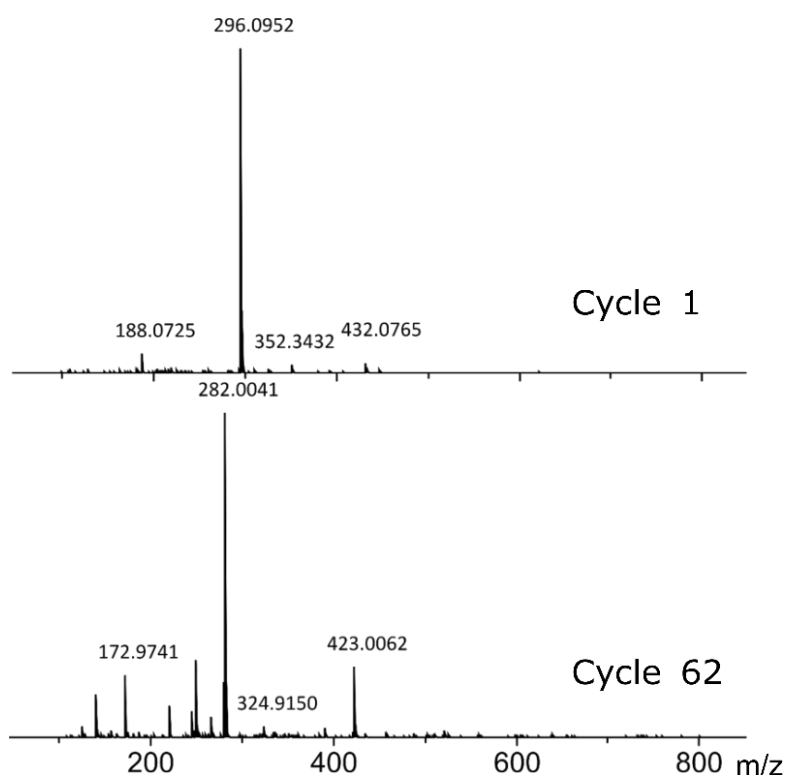

**Supplementary Figure 20:** Spectra of Bruker chromatogram, range from 8.5 to 8.9 minutes, section III of Figure 11.

Neither of the following spectra have peaks, which we completely identified, the peaks in Supplementary Figure 20 could be related to the catechol input solution or to product species of a catechol related reaction, as these peaks are solely observed if the compound is present in the system. In Supplementary Figure 21: Spectra of Bruker chromatogram range from 12.2 to 12.8 minutes, none of the peaks in the spectra relate to input solutions leading to the assumption that these are product species or contaminants.

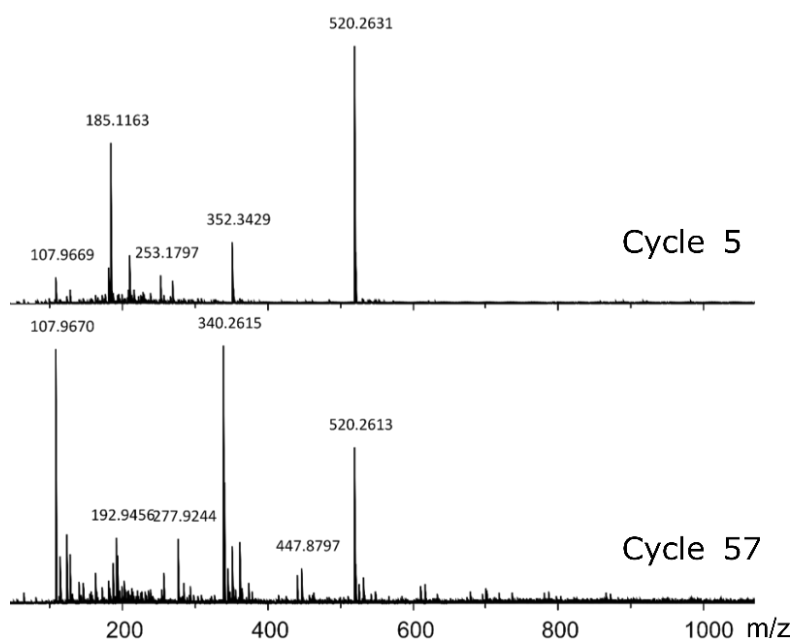

**Supplementary Figure 21:** Spectra of Bruker chromatogram range from 12.2 to 12.8 minutes, section IV of Figure 11.

## 4.2 Formula identification

### 4.2.1 Experimentally found values

Following is a list of found  $m/z$  values in the Bruker spectra and proposed molecular formulas based on this value. Differences between the measured  $m/z$  value and the monoisotopic mass can be caused by common adducts in positive mode MS like hydrogen, sodium or potassium.

**Supplementary Table 6:** Measured  $m/z$  and proposed correlating formula and monoisotopic mass of selected cycles of run G

| Cycle 1  |           |                   | Cycle 5  |           |                   |
|----------|-----------|-------------------|----------|-----------|-------------------|
| $m/z$    | Formula   | Monoisotopic mass | $m/z$    | Formula   | Monoisotopic mass |
| 107.9671 | C3HO3     | 84.9926           | 107.9668 | C3HO3     | 84.9926           |
| 128.9516 | CNO5      | 105.9776          | 128.9512 | CNO5      | 105.9776          |
| 145.9308 | CHNO6     | 122.9804          | 145.9304 | CHNO6     | 122.9804          |
| 146.9624 | C5O4      | 123.9797          | 146.9622 | C5O4      | 123.9797          |
| 158.9643 | CN2O6     | 135.9756          | 158.9625 | CN2O6     | 135.9756          |
| 163.9417 | C5HO5     | 163.9716          | 163.9414 | C5HO5     | 163.9716          |
| 181.9527 | C11HO3    | 181.9998          | 181.9523 | C11HO3    | 181.9998          |
| 185.1168 | C11H16N   | 162.1283          | 185.1166 | C11H16N   | 162.1283          |
| 186.9583 | C7O5      | 163.9746          | 186.9579 | C7O5      | 163.9746          |
| 188.0733 | C11H10NO2 | 188.2             | 188.0723 | C11H10NO2 | 188.2             |
| 189.0761 | C9H12NO2  | 166.0868          | 189.0756 | C9H12NO2  | 166.0868          |
| 190.0785 | C9H13NO2  | 167.0946          | 191.106  | C12H14O2  | 190.0994          |

|          |            |          |          |            |          |
|----------|------------|----------|----------|------------|----------|
| 191.1062 | C12H14O2   | 190.0994 | 195.101  | C12H14N    | 172.1126 |
| 195.1013 | C12H14N    | 172.1126 | 202.9531 | C2H2O11    | 201.9597 |
| 204.0677 | C11H9NO3   | 203.0582 | 204.0673 | C11H9NO3   | 203.0582 |
| 209.1172 | C12H16O3   | 208.1099 | 204.9709 | CH2NO11    | 203.9628 |
| 213.9252 | C8HNO5     | 190.9855 | 209.1169 | C12H16O3   | 208.1099 |
| 217.1072 | C10H16O5   | 216.0998 | 213.9247 | C8HNO5     | 190.9855 |
| 226.9551 | C9H2NO5    | 203.9933 | 217.1068 | C10H16O5   | 216.0998 |
| 256.0632 | C12H11NO4  | 233.0688 | 226.9566 | C9H2NO5    | 203.9933 |
| 257.2506 | C12H18NO5  | 256.1185 | 257.2499 | C12H18NO5  | 256.1185 |
| 283.2278 | C13H16NO6  | 282.0978 | 283.2276 | C13H16NO6  | 282.0978 |
| 296.0955 | C12H19NO6  | 273.1212 | 285.2816 | C17H20N2O2 | 284.1525 |
| 297.0987 | C12H20NO6  | 274.1291 | 329.3269 | C20H18N5   | 328.1562 |
| 326.0703 | C11H15N2O8 | 303.0828 | 352.343  | C17H19N8O  | 351.1682 |
| 329.3275 | C20H18N5   | 328.1562 | 353.3458 | C18H20N6O2 | 352.1648 |
| 352.3435 | C17H19N8O  | 351.1682 | 354.3451 | C16H19N9O  | 353.1713 |
| 353.3464 | C18H20N6O2 | 352.1648 | 520.2636 | C20H19NO14 | 497.0806 |
| 354.3457 | C16H19N9O  | 353.1713 |          |            |          |
| 520.2646 | C20H19NO14 | 497.0806 |          |            |          |

**Cycle  
10**

**Cycle  
15**

| m/z      | Formula                         | Monoisotopic mass | m/z      | Formula   | Monoisotopic mass |
|----------|---------------------------------|-------------------|----------|-----------|-------------------|
| 80.0486  | C <sub>5</sub> H <sub>5</sub> N | 79.0421           | 97.9682  | CHNO3     | 74.9956           |
| 107.9665 | C3HO3                           | 84.9926           | 107.9664 | C3HO3     | 84.9926           |
| 128.9508 | CNO5                            | 105.9776          | 128.9507 | CNO5      | 105.9776          |
| 141.9588 | C2HNO5                          | 118.9855          | 141.9587 | C2HNO5    | 118.9855          |
| 145.93   | CHNO6                           | 122.9804          | 145.9299 | CHNO6     | 122.9804          |
| 146.9616 | C5O4                            | 123.9797          | 146.9616 | C5O4      | 123.9797          |
| 158.9619 | CN2O6                           | 135.9756          | 158.0034 | C3H5NO5   | 135.0168          |
| 163.9409 | C5HO5                           | 163.9716          | 158.9625 | CN2O6     | 135.9756          |
| 181.9517 | C11HO3                          | 181.9998          | 159.9694 | C2HO7     | 136.9722          |
| 185.1161 | C11H16N                         | 162.1283          | 163.9407 | C5HO5     | 163.9716          |
| 186.9574 | C7O5                            | 163.9746          | 181.0114 | C8H4O5    | 180.0059          |
| 188.0716 | C11H10NO2                       | 188.2             | 181.0847 | C10H12O3  | 180.0786          |
| 191.1056 | C12H14O2                        | 190.0994          | 181.9515 | C11HO3    | 181.9998          |
| 195.1005 | C12H14N                         | 172.1126          | 185.1157 | C11H16N   | 162.1283          |
| 202.9523 | C2N2O8                          | 179.9655          | 186.957  | C7O5      | 163.9746          |
| 204.0668 | C11H9NO3                        | 203.0582          | 188.0715 | C11H10NO2 | 188.2000          |
| 204.9704 | C2H2N2O8                        | 181.9811          | 189.0742 | C9H12NO2  | 166.0868          |
| 209.1164 | C12H16O3                        | 208.1099          | 191.1052 | C12H14O2  | 190.0994          |
| 213.9243 | C8HNO5                          | 190.9855          | 195.1002 | C12H14N   | 172.1126          |
| 217.1063 | C10H16O5                        | 216.0998          | 199.0221 | C8H6O6    | 198.0164          |
| 226.9559 | C9H2NO5                         | 203.9933          | 201.0381 | C9H8NO3   | 178.0504          |
| 236.9411 | C10NO5                          | 213.9776          | 204.9696 | C7H2O6    | 181.9851          |
| 257.2494 | C12H18NO5                       | 256.1185          | 209.116  | C12H16O3  | 208.1099          |
| 283.2269 | C13H16NO6                       | 282.0978          | 211.0953 | C11H14O4  | 210.0892          |



|          |            |          |          |            |          |
|----------|------------|----------|----------|------------|----------|
| 285.2809 | C18H36O2   | 284.2715 | 213.9237 | C8HNO5     | 190.9855 |
| 329.3261 | C20H18N5   | 328.1562 | 217.1059 | C10H16O5   | 216.0998 |
| 352.3422 | C17H19N8O  | 351.1682 | 231.9344 | C8H3NO6    | 208.9960 |
| 353.345  | C18H20N6O2 | 352.1648 | 236.9404 | C6H2N2O7   | 213.9862 |
| 354.3445 | C16H19N9O  | 353.1713 | 246.8639 | C10NO7     | 245.9675 |
| 520.2627 | C20H19NO14 | 497.0806 | 254.951  | C10H2NO6   | 231.9882 |
|          |            |          | 257.249  | C12H18NO5  | 256.1185 |
|          |            |          | 263.112  | C11H18O7   | 262.1053 |
|          |            |          | 264.8744 | C11NO6     | 241.9726 |
|          |            |          | 282.8852 | C10N2O7    | 259.9706 |
|          |            |          | 283.226  | C13H16NO6  | 282.0978 |
|          |            |          | 285.2803 | C18H36O2   | 284.2715 |
|          |            |          | 305.9014 | C13HNO7    | 282.9753 |
|          |            |          | 329.3253 | C20H18N5   | 328.1562 |
|          |            |          | 352.3413 | C17H19N8O  | 351.1682 |
|          |            |          | 353.3441 | C18H20N6O2 | 352.1648 |
|          |            |          | 354.3433 | C16H19N9O  | 353.1713 |
|          |            |          | 520.2611 | C20H19NO14 | 497.0806 |
|          |            |          | 520.7628 | C20H2N8O9  | 497.9945 |

| <b>Cycle 20</b> |                |                          | <b>Cycle 25</b> |                |                          |
|-----------------|----------------|--------------------------|-----------------|----------------|--------------------------|
| <b>m/z</b>      | <b>Formula</b> | <b>Monoisotopic mass</b> | <b>m/z</b>      | <b>Formula</b> | <b>Monoisotopic mass</b> |
| 107.9664        | C3HO3          | 84.9926                  | 107.9663        | CHNO3S         | 106.9677                 |
| 115.0364        | C3H8O3         | 92.0473                  | 115.0363        | C3H8O3         | 92.0473                  |
| 128.9506        | CNO5           | 105.9776                 | 128.9506        | CNO3S          | 105.9599                 |
| 141.9587        | C2HNO5         | 118.9855                 | 145.9299        | CHNO2S2        | 122.9449                 |
| 145.9299        | CHNO6          | 122.9804                 | 146.9615        | CH2NO4S        | 123.9705                 |
| 146.9616        | C5O4           | 123.9797                 | 163.9406        | CHO6S          | 140.9494                 |
| 158.0032        | C3H5NO5        | 135.0168                 | 171.0633        | C6H12O4        | 148.0736                 |
| 163.9406        | C5HO5          | 163.9716                 | 173.079         | C8H12O4        | 172.0736                 |
| 171.0634        | C9H10NO        | 148.0762                 | 181.0846        | C6H16N2S2      | 180.0755                 |
| 181.9515        | C11HO3         | 181.9998                 | 181.9515        | C3HO7S         | 180.9443                 |
| 185.1157        | C11H16N        | 162.1283                 | 185.1157        | C10H16O3       | 184.1099                 |
| 186.957         | C7O5           | 163.9746                 | 186.9571        | C5H2N2O2S2     | 185.9558                 |
| 191.1052        | C12H14O2       | 190.0994                 | 191.105         | C7H14N2O4      | 190.0954                 |
| 192.9802        | C2H4NO8        | 169.9937                 | 195.0999        | C7H18N2S2      | 194.0911                 |
| 195.1001        | C12H14N        | 172.1126                 | 204.9681        | C5H4N2O3S2     | 203.9663                 |
| 204.968         | C7H2O6         | 181.9851                 | 209.1159        | C10H18O3       | 186.1256                 |
| 209.116         | C12H16O3       | 208.1099                 | 213.9237        | C3HO7S2        | 212.9164                 |
| 213.9236        | C8HNO5         | 190.9855                 | 217.1059        | C10H16O5       | 216.0998                 |
| 217.1059        | C10H16O5       | 216.0998                 | 231.9346        | C4H3NO5S2      | 208.9453                 |
| 236.9405        | C6H2N2O7       | 213.9862                 | 236.9404        | C6H2N2O3S2     | 213.9507                 |
| 238.0149        | C16HN2O        | 237.0089                 | 254.9509        | C6H4N2O4S2     | 231.9612                 |
| 239.022         | C13H4NO4       | 238.014                  | 257.2489        | C8H20N2O7      | 256.1271                 |
| 254.9513        | C10H2NO6       | 231.9882                 | 282.0032        | C8H11NO6S2     | 281.0028                 |

|          |            |          |          |            |          |
|----------|------------|----------|----------|------------|----------|
| 257.2488 | C12H18NO5  | 256.1185 | 283.2259 | C9H18N2O6S | 282.0886 |
| 282.0033 | C14H3NO6   | 280.996  | 329.3254 | C20H18N5   | 328.1562 |
| 283.0282 | C6H8N3O10  | 282.021  | 352.3413 | C17H19N8O  | 351.1682 |
| 283.2261 | C13H16NO6  | 282.0978 | 353.344  | C18H20N6O2 | 352.1648 |
| 329.3254 | C20H18N5   | 328.1562 | 520.2613 | C20H19NO14 | 497.0806 |
| 352.3413 | C17H19N8O  | 351.1682 | 520.7629 | C20H2N8O9  | 497.9945 |
| 353.3443 | C18H20N6O2 | 352.1648 |          |            |          |
| 354.3432 | C16H19N9O  | 353.1713 |          |            |          |
| 520.2613 | C20H19NO14 | 497.0806 |          |            |          |

| <b>Cycle 30</b> |                |                          | <b>Cycle 35</b> |                |                          |
|-----------------|----------------|--------------------------|-----------------|----------------|--------------------------|
| <b>m/z</b>      | <b>Formula</b> | <b>Monoisotopic mass</b> | <b>m/z</b>      | <b>Formula</b> | <b>Monoisotopic mass</b> |
| 107.9662        | CHNO3S         | 106.9677                 | 107.9662        | CO4P           | 106.9534                 |
| 115.0363        | C3H8O3         | 92.0473                  | 115.0362        | C5H6O3         | 114.0317                 |
| 128.9505        | CNO3S          | 105.9599                 | 122.9243        | CO3P2          | 121.9323                 |
| 145.9299        | CHNO2S2        | 122.9449                 | 128.9505        | H2O4P2         | 127.9428                 |
| 158.0032        | C6H5O3S        | 156.9959                 | 145.9299        | C2H4KOP2       | 144.9374                 |
| 163.9407        | CHO6S          | 140.9494                 | 163.9407        | C3HO4P2        | 162.9350                 |
| 171.0634        | C6H12O4        | 148.0736                 | 167.0319        | C8H6O4         | 166.0266                 |
| 173.079         | C8H12O4        | 172.0736                 | 178.9512        | C4H5KO3        | 139.9876                 |
| 178.9514        | C4H2O4S2       | 177.9395                 | 181.0847        | C10H12O3       | 180.0786                 |
| 181.0848        | C6H16N2S2      | 180.0755                 | 181.9514        | C3H3O5P2       | 180.9456                 |
| 181.9515        | C3HO7S         | 180.9443                 | 185.1157        | C10H16O3       | 184.1099                 |
| 185.1157        | C10H16O3       | 184.1099                 | 186.957         | C2H4O6P2       | 185.9483                 |
| 186.9572        | C5H2N2O2S2     | 185.9558                 | 191.1051        | C12H14O2       | 190.0994                 |
| 190.8646        | CH2O7S2        | 189.9242                 | 195.1           | C9H16O3        | 172.1099                 |
| 191.1051        | C7H14N2O4      | 190.0954                 | 200.9329        | C2H2O7P2       | 199.9276                 |
| 192.9804        | C5H4O6S        | 191.9729                 | 201.9276        | C2H3K2O6       | 200.9204                 |
| 195.1001        | C7H18N2S2      | 194.0911                 | 204.9677        | C4H6KO5P       | 203.9590                 |
| 201.9277        | C3HNO4S2       | 178.9347                 | 209.1158        | C12H16O3       | 208.1099                 |
| 204.9679        | C5H4N2O3S2     | 203.9663                 | 210.9333        | C6H5K3O        | 209.9252                 |
| 209.1159        | C10H18O3       | 186.1256                 | 212.8519        | C2HK4P         | 211.8364                 |
| 210.9335        | C2H4O6S2       | 187.9449                 | 213.9238        | CH3KO8P        | 212.9203                 |
| 213.9239        | C3HO7S2        | 212.9164                 | 216.9074        | C2H3K2O5P      | 215.8992                 |
| 216.9078        | C2H2NO7S2      | 215.9273                 | 217.1059        | C10H16O5       | 216.0998                 |
| 217.1059        | C10H16O5       | 216.0998                 | 224.0929        | C12H16O2P      | 223.0888                 |
| 228.821         | C5H2O5S2       | 205.9344                 | 228.8207        | HK3O3P2        | 227.8312                 |
| 236.9405        | C6H2N2O3S2     | 213.9507                 | 236.9404        | C6H7K2O3P      | 235.9407                 |
| 239.0537        | C7H14N2O3S2    | 238.0446                 | 239.0539        | C11H10O6       | 238.0477                 |
| 254.8642        | C8NO5S2        | 253.9218                 | 254.8639        | C2H2K3O5P      | 253.8551                 |
| 254.9511        | C6H4N2O4S2     | 231.9612                 | 257.2489        | C9H20O8        | 256.1158                 |
| 257.249         | C8H20N2O7      | 256.1271                 | 266.9269        | C5H11K3OP2     | 265.9196                 |
| 263.112         | C10H18N2O4S    | 262.0987                 | 277.8692        | C6HK2O4P2      | 276.8624                 |
| 277.8694        | C6HN2O7S2      | 276.9225                 | 283.2262        | C10H18O9       | 282.0951                 |

|          |              |          |          |             |          |
|----------|--------------|----------|----------|-------------|----------|
| 283.2262 | C9H18N2O6S   | 282.0886 | 292.8202 | C2H2K4O3P2  | 291.8027 |
| 295.88   | C10HNO6S2    | 294.9245 | 294.8189 | C5HK3O2P2   | 271.8363 |
| 318.8965 | C10H8NO7S2   | 317.9742 | 295.8797 | C6H3K2O5P2  | 294.8730 |
| 323.9116 | C10H13NO7S2  | 323.0133 | 318.8961 | C9H6K4O3    | 317.8865 |
| 342.7669 | C10N4O5S2    | 319.931  | 330.7765 | C2H2K4O4P2  | 307.7977 |
| 352.3415 | C17H19N8O    | 351.1682 | 345.0635 | C12H17KO9   | 344.0510 |
| 353.3444 | C18H20N6O2   | 352.1648 | 352.3415 | C20H40KO2   | 351.2665 |
| 415.9604 | C9H11N4O7S4  | 414.9511 | 353.3445 | C17H36O7    | 352.2461 |
| 422.7932 | C10H12N2O7S4 | 399.9527 | 422.7929 | C13H2K2P6   | 421.7856 |
| 520.2614 | C20H19NO14   | 497.0806 | 432.8086 | C4H11KO4P8  | 409.8195 |
| 520.7633 | C20H2N8O9    | 497.9945 | 470.7652 | C6H6K4O7P4  | 469.7612 |
|          |              |          | 508.7212 | C13H2K4O2P4 | 469.7554 |
|          |              |          | 520.2615 | C20H39O15   | 519.2289 |
|          |              |          | 546.6773 | C2H2K4O15P4 | 545.6892 |

| <b>Cycle 40</b> |                |                          | <b>Cycle 45</b> |                |                          |
|-----------------|----------------|--------------------------|-----------------|----------------|--------------------------|
| <b>m/z</b>      | <b>Formula</b> | <b>Monoisotopic mass</b> | <b>m/z</b>      | <b>Formula</b> | <b>Monoisotopic mass</b> |
| 107.9662        | CO4P           | 106.9534                 | 107.9661        | C2H3OS2        | 106.9625                 |
| 115.0362        | C5H6O3         | 114.0317                 | 123.9404        | C2H4CuS        | 122.933                  |
| 128.9504        | H2O4P2         | 127.9428                 | 128.9504        | C2H3O2P        | 89.9871                  |
| 145.9296        | C2H4KOP2       | 144.9374                 | 141.9585        | C3H4O2P        | 102.9949                 |
| 163.9405        | C3HO4P2        | 162.9350                 | 145.9296        | CH2CuNO2       | 122.9382                 |
| 167.0316        | C8H6O4         | 166.0266                 | 159.9692        | C2H5NO2P2      | 136.9796                 |
| 174.8872        | H2K2O2P2       | 173.8804                 | 163.9404        | CH3NO4S        | 124.9783                 |
| 178.9511        | C4H5KO3        | 139.9876                 | 174.8868        | K2O4S          | 173.8791                 |
| 181.0846        | C10H12O3       | 180.0786                 | 181.9512        | CH7CuKN2O2     | 180.9441                 |
| 181.9514        | C3H3O5P2       | 180.9456                 | 186.9567        | C3H8OP2S2      | 185.9492                 |
| 185.1155        | C10H16O3       | 184.1099                 | 204.9674        | C5H10KPS2      | 203.9599                 |
| 186.9569        | C2H4O6P2       | 185.9483                 | 213.9234        | CH7CuKN2O2S    | 212.9161                 |
| 191.1049        | C12H14O2       | 190.0994                 | 228.1966        | C6H15N2O7      | 227.0879                 |
| 195.0998        | C9H16O3        | 172.1099                 | 246.8635        | C2H4K4NOS      | 245.8562                 |
| 204.9676        | C4H6KO5P       | 203.9590                 | 257.2485        | C12H35NO2P     | 256.2405                 |
| 209.1156        | C12H16O3       | 208.1099                 | 264.8742        | C6H4KPS3       | 241.885                  |
| 210.933         | C6H5K3O        | 209.9252                 | 282.885         | C5H10K2S3      | 243.9219                 |
| 212.8435        | HK3O2P2        | 211.8363                 | 283.2255        | C9H34N2O5S     | 282.2188                 |
| 213.9236        | CH3KO8P        | 212.9203                 | 287.8902        | C3H9NO2P2S3    | 248.9271                 |
| 214.8412        | CHKOP4         | 191.8615                 | 305.9008        | C8H7KNPS3      | 282.9115                 |
| 216.9072        | C2H3K2O5P      | 215.8992                 | 310.8114        | C3H3K4NOPS     | 287.8221                 |
| 217.1057        | C10H16O5       | 216.0998                 | 352.3408        | C12H35N2O9     | 351.2343                 |
| 239.0537        | C11H10O6       | 238.0477                 | 353.3436        | C8H36N2O12     | 352.2268                 |

|          |            |          |          |               |          |
|----------|------------|----------|----------|---------------|----------|
| 254.8636 | C2H2K3O5P  | 253.8551 | 520.2601 | C10H35N2O21   | 519.1732 |
| 257.2486 | C9H20O8    | 256.1158 | 520.7616 | CH21CuK4N2OS7 | 497.7724 |
| 277.8691 | C6HK2O4P2  | 276.8624 |          |               |          |
| 283.2258 | C10H18O9   | 282.0951 |          |               |          |
| 292.8198 | C2H2K4O3P2 | 291.8027 |          |               |          |
| 295.8796 | C6H3K2O5P2 | 294.8730 |          |               |          |
| 310.8118 | C2H5K4O2P3 | 309.8051 |          |               |          |
| 345.0632 | C12H17KO9  | 344.0510 |          |               |          |
| 352.3413 | C20H40KO2  | 351.2665 |          |               |          |
| 353.3441 | C17H36O7   | 352.2461 |          |               |          |
| 390.7886 | C5HKO8P4   | 351.8259 |          |               |          |
| 428.7445 | C6H6K4O2P4 | 389.7867 |          |               |          |
| 520.2611 | C20H39O15  | 519.2289 |          |               |          |

| <b>Cycle 50</b> |                |                          | <b>Cycle 55</b> |                |                          |
|-----------------|----------------|--------------------------|-----------------|----------------|--------------------------|
| <b>m/z</b>      | <b>Formula</b> | <b>Monoisotopic mass</b> | <b>m/z</b>      | <b>Formula</b> | <b>Monoisotopic mass</b> |
| 97.9683         | HO4S           | 96.9596                  | 107.9668        | HN3S2          | 106.9612                 |
| 107.9664        | HN3S2          | 106.9612                 | 115.0368        | H4NO4S         | 113.9861                 |
| 113.9634        | H4CuNO2        | 112.9538                 | 123.9412        | H6CuO2         | 100.9664                 |
| 123.9407        | H6CuO2         | 100.9664                 | 128.9511        | H3CuNO3        | 127.9409                 |
| 128.9507        | H3CuNO3        | 127.9409                 | 141.9592        | H3N3S3         | 140.9489                 |
| 141.9588        | H3N3S3         | 140.9489                 | 145.9303        | HO5S2          | 144.9265                 |
| 145.9298        | HO5S2          | 144.9265                 | 163.9411        | H9Cu2N2        | 162.9358                 |
| 146.9615        | N2O6           | 123.9756                 | 181.9519        | H11Cu2N2O      | 180.9463                 |
| 159.9695        | H5N3OS3        | 158.9595                 | 186.9573        | H9CuN2O2S      | 163.9681                 |
| 163.9406        | H9Cu2N2        | 162.9358                 | 192.9458        | H6N3OS4        | 191.9394                 |
| 181.9513        | H11Cu2N2O      | 180.9463                 | 204.9693        | H4N4O5S2       | 203.9623                 |
| 186.9568        | H9CuN2O2S      | 163.9681                 | 228.1974        | H19N3O7S       | 205.0944                 |
| 192.9452        | H6N3OS4        | 191.9394                 | 257.2491        | H28N6O9        | 256.1918                 |
| 204.9676        | H4N4O5S2       | 203.9623                 | 277.9238        | H11Cu2N2O7     | 276.9158                 |
| 213.9237        | H4CuN2O6       | 190.9365                 | 282.8857        | H5CuO8S2       | 259.8722                 |
| 228.1967        | H19N3O7S       | 205.0944                 | 352.3413        | H39N4O16       | 351.2361                 |
| 246.8636        | H6Cu2N2O2S     | 223.8742                 | 353.3441        | H40N4O16       | 352.2439                 |
| 257.2486        | H28N6O9        | 256.1918                 |                 |                |                          |
| 264.8743        | H9CuO4S4       | 263.868                  |                 |                |                          |
| 276.898         | H7CuNO8S2      | 275.8909                 |                 |                |                          |
| 277.9229        | H11Cu2N2O7     | 276.9158                 |                 |                |                          |
| 282.8851        | H5CuO8S2       | 259.8722                 |                 |                |                          |
| 287.8904        | H2CuNO7S3      | 286.8289                 |                 |                |                          |
| 305.901         | H4CuNO8S3      | 304.8395                 |                 |                |                          |
| 352.3408        | H39N4O16       | 351.2361                 |                 |                |                          |
| 353.3438        | H40N4O16       | 352.2439                 |                 |                |                          |

| <b>Cycle 60</b> |  |  | <b>Cycle 65</b> |  |  |
|-----------------|--|--|-----------------|--|--|
|-----------------|--|--|-----------------|--|--|

| m/z      | Formula     | Monoisotopic mass | m/z      | Formula     | Monoisotopic mass |
|----------|-------------|-------------------|----------|-------------|-------------------|
| 107.9673 | C2H3OS2     | 106.9625          | 107.9674 | C2H3OS2     | 106.9625          |
| 115.0373 | C5H6O3      | 114.0317          | 115.0374 | C5H6O3      | 114.0317          |
| 123.9416 | CHNO2S2     | 122.9449          | 123.9416 | CHNO2S2     | 122.9449          |
| 128.9516 | CH2N2OS     | 89.9888           | 128.9517 | CH2N2OS     | 89.9888           |
| 145.9308 | CHNO3S      | 106.9677          | 145.9310 | CHNO3S      | 106.9677          |
| 146.9626 | CH4N2O2S    | 107.9993          | 163.9418 | CH3NO4S     | 124.9783          |
| 163.9416 | CH3NO4S     | 124.9783          | 181.9527 | C4HNO4S     | 158.9626          |
| 181.9525 | C4HNO4S     | 158.9626          | 186.9582 | C2H4NO5S2   | 185.9531          |
| 186.9579 | C2H4NO5S2   | 185.9531          | 192.9464 | C5H2N2O2S   | 153.9837          |
| 192.9463 | C5H2N2O2S   | 153.9837          | 199.0235 | C8H6O6      | 198.0164          |
| 204.9703 | C3H6N2O3S2  | 181.982           | 228.1983 | C7H17NO7    | 227.1005          |
| 228.1982 | C7H17NO7    | 227.1005          | 257.2504 | C8H20N2O7   | 256.1271          |
| 238.0158 | C8H9NO4S    | 215.0252          | 277.9248 | C8H3N2O2S3  | 254.9357          |
| 250.0318 | C9H9NO6     | 227.043           | 282.0046 | C7H11N3O3S3 | 280.9963          |
| 257.2502 | C8H20N2O7   | 256.1271          | 352.3430 | C15H29N4OS  | 313.2062          |
| 277.9249 | C8H3N2O2S3  | 254.9357          | 353.3459 | C16H36N2O6  | 352.2573          |
| 282.0042 | C7H11N3O3S3 | 280.9963          |          |             |                   |
| 352.3427 | C15H29N4OS  | 313.2062          |          |             |                   |
| 353.3456 | C16H36N2O6  | 352.2573          |          |             |                   |

#### 4.2.2 Matching experimental and theoretical formulas

The network model described in the main manuscript, predicted 2206 possible reactions with the used input library. The theoretical number of the resulting products of these reactions is 429 (multiple reactions can lead to the same product). These products have been checked with the proposed experimentally assigned formula above in Supplementary Table 6 and 22 matching structures have been identified as listed below in Supplementary Table 7.

**Supplementary Table 7:** Matching formulas of experimentally and theoretical found structures

| FORMULA         | MOLECULAR WEIGHT | COMPOUND NAME              |
|-----------------|------------------|----------------------------|
| <b>C3H9NO2</b>  | 91.11            | 3-aminopropane-1,2-diol    |
| <b>C6H8N+</b>   | 94.13            | 1-Methylpyridinium         |
| <b>C3HNO4</b>   | 115.04           | Iminomalonate              |
| <b>C2H5NO</b>   | 59.07            | Acetamide                  |
| <b>H2O7P2-2</b> | 175.96           | dihydrogen diphosphate     |
| <b>C3H4O2</b>   | 72.06            | 3-Oxetanone                |
| <b>C2H5NO2</b>  | 75.07            | Methyl carbamate           |
| <b>C5H4O6</b>   | 160.08           | 2,4-Dioxopentanedioic acid |
| <b>N2O5</b>     | 108.01           | Dinitrogen pentoxide       |
| <b>O4P-3</b>    | 94.971           | orthophosphate             |

|                   |        |                                |
|-------------------|--------|--------------------------------|
| <b>C8H6O4</b>     | 166.13 | 6,7-Dihydroxycoumaranone       |
| <b>C5H4N2O3</b>   | 140.1  | 5-Formyluracil                 |
| <b>CH2N2</b>      | 42.04  | Cyanamide                      |
| <b>C6H4N2</b>     | 104.11 | 3-Cyanopyridine                |
| <b>C3H5NO</b>     | 71.08  | Acrylamide                     |
| <b>C3H5NO5</b>    | 163.13 | 3-(Nitrooxy)propanoic acid     |
| <b>C5H4N2</b>     | 92.1   | Pyrrole-2-carbonitrile         |
| <b>C6H12O4</b>    | 148.16 | 1-O-Methyl-2-deoxy-D-ribose    |
| <b>C9H12NO2+</b>  | 166.2  | 1-carboxy-2-phenylethanaminium |
| <b>C3H8O3</b>     | 92.09  | 1,1,2-Propanetriol             |
| <b>C11H10NO2+</b> | 188.2  | indole-3-propanoate            |
| <b>C5H6O3</b>     | 114.1  | 4,5-Dimethyl-1,3-dioxol-2-one  |

#### 4.2.3 Product persistence over dilution

The product peaks shown above in 4.2.2 have been tracked by their intensity over the duration of the run time. Supplementary Figure 22 shows that some product species do persist throughout the run while others are being diluted out after a change in the input composition.

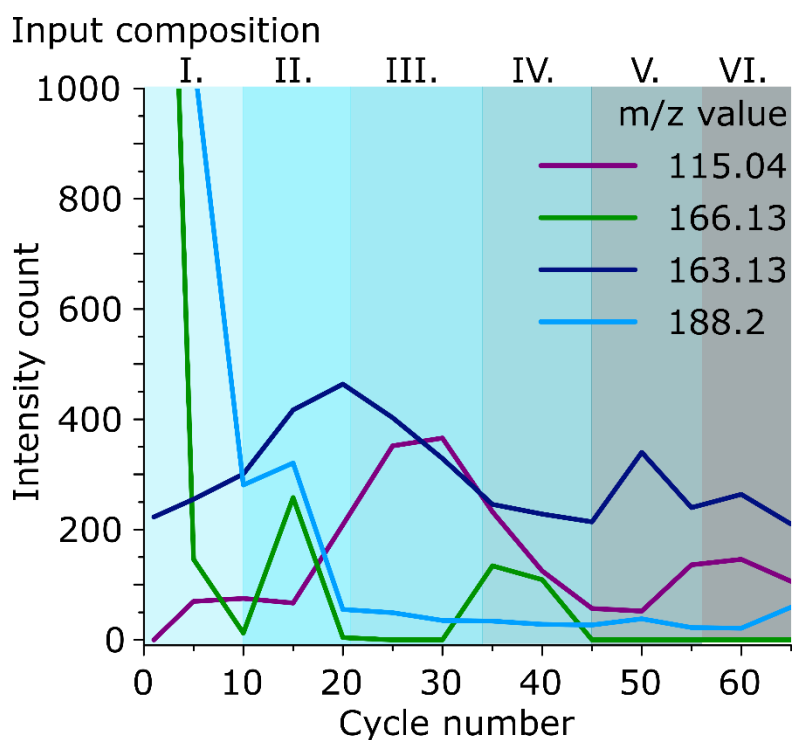

**Supplementary Figure 22:** Comparison of product peaks of run G. The purple line shows a peak not present in cycle 1 but rising through the whole run up from cycle 2. The green line shows a peak which is high in the initial cycle but is not persisting throughout the run. The dark blue line shows a product peak, present through the full run and the pale blue line shows a peak which is high with the initial input composition but decreasing throughout the run.

## 5 Decision Making Algorithm

### 5.1 Architecture

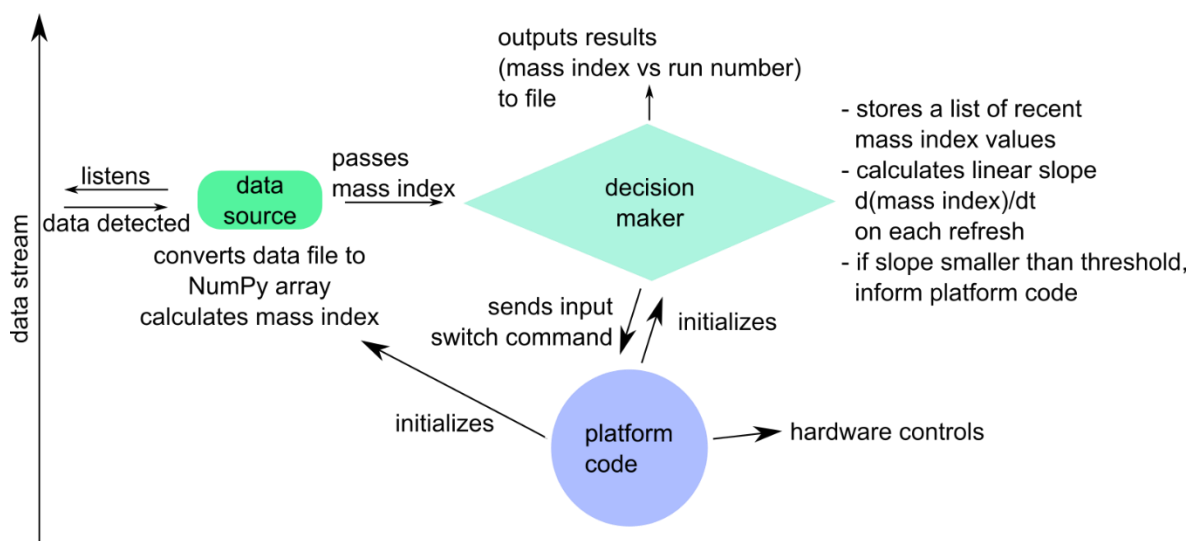

**Supplementary Figure 23:** The general architecture of the software controls of the recursive reactor responsible for the background work. The platform code (dark blue) controls the overall experiment, initialises the analysis and manages the hardware control. The data source (green) takes the data from the Advion MS and calculates it into a value which the decision maker (pale blue) can interpret and pass back to the platform code for experiment adjustments.

The control software, written in Python 3, is designed to be modular as well as extensible and incorporates data analysis functionality spread over several Python classes (Supplementary Figure 23). The data source in the form of the DataSource class is responsible for monitoring the directory in which the analytical data is saved for changes, calculating the appropriate measure of complexity and exposing it to the decision-making algorithm. The DataSource class was designed to utilize various data types and formats; in addition to the LC-MS data used in the present work, other inputs such as chromatography and nuclear magnetic resonance spectroscopy could also be employed.

The decision-making itself is the responsibility of the DecisionMaker class, which implements the algorithm described below; based on the outcome, it sends the appropriate command to the main hardware control loop, as well as saving the results of the calculations to a file for any required offline analysis and plotting.

The main hardware control loop is tasked with interfacing with all the physical components of the system: the stirrer/heater, the pumps and the valves. Whenever a run is started, it also initializes the data source, specifying the directory in which to wait for new data, as well as starting the decision maker in a separate thread to prevent blocking.

## 5.2 Measure of complexity

As mentioned above, the measure of complexity will be specified differently depending on the data format and the analytical technique used. For the bulk of the present study, we focused on the mass spectrometry data and on the so-called Mass Index, used by our group earlier for monitoring complexity changes in amino acid mixtures.

The Mass Index is a real number carrying information on the number of peaks and the mass range in a given mass spectrum. Since each data point in our case was a total ion current (TIC) chromatogram recorded by the LC-MS equipment, a modified approach was required. Upon successful acquisition, the data was exported on-line to the NetCDF file format. This was read using the Python library `netCDF4` to convert it to an in-memory array accessible to Python. The resulting array could be thought of as a stack of mass spectra, each entry corresponding to a certain retention time. For each mass spectrum, the Mass Index was calculated by discarding all peaks whose intensity was less than  $10^6$ , subtracting the lowest  $m/z$  value in the spectrum from the highest, and dividing the result by the number of peaks. If there were no peaks left after applying the intensity thresholding, the value 0.0 was returned. The general visual idea for the process of extracting the Mass Index is presented in Supplementary Figure 24.

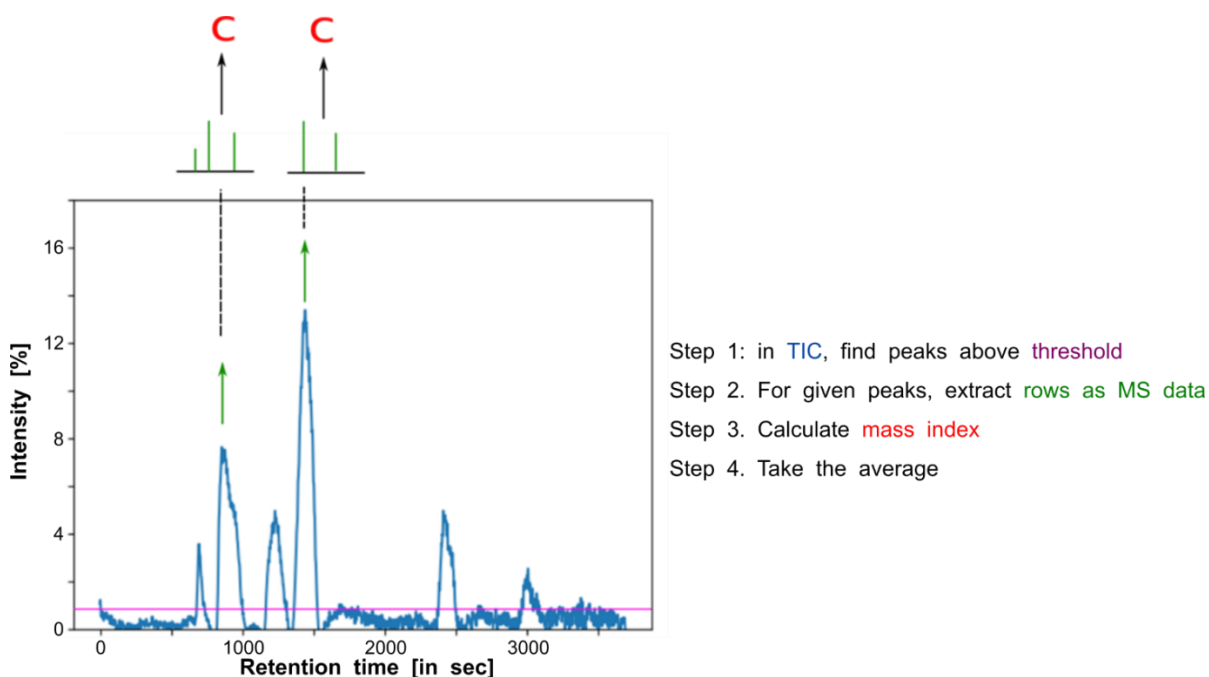

**Supplementary Figure 24:** Conceptual scheme of the steps required to convert the total ion chromatograms (TICs) recorded on-line during system operation to individual numbers, i.e. mass indices.

The obtained list of mass indices for the individual components of the TIC was then averaged, and the result was passed on to the decision-making algorithm as a complexity measure.



### 5.3 Decision making algorithm example

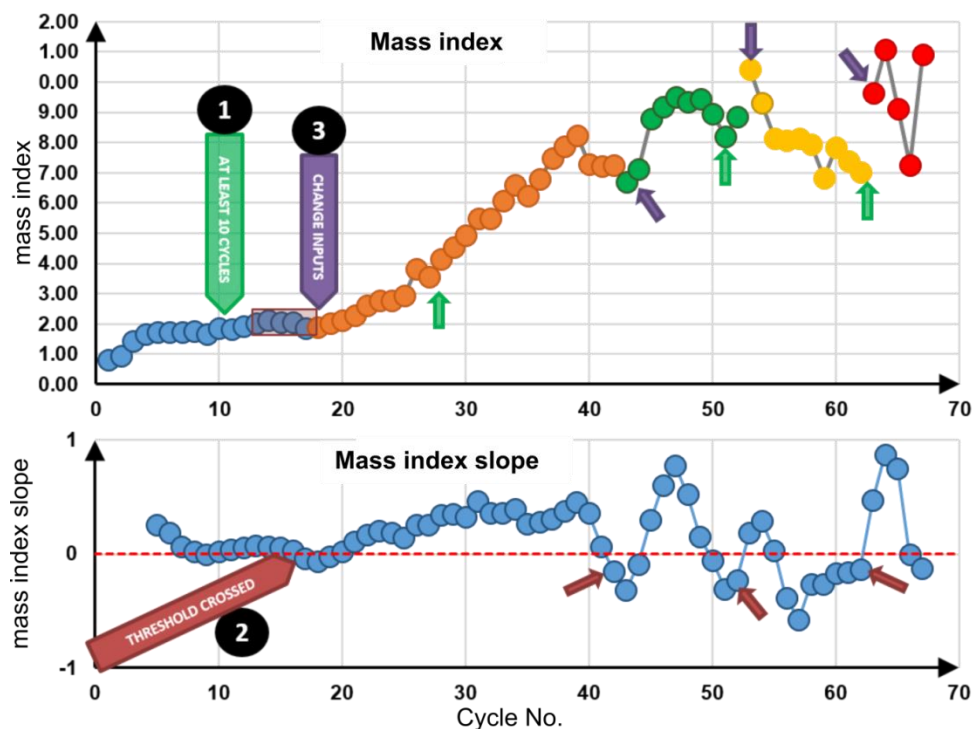

**Supplementary Figure 25:** Concept of assigning change, visualised with real data of a run assigned with the Mass Index. The top graph shows the Mass Index of each cycle with each input set in a different colour, while the graph in the bottom shows the slope between the Mass Index values of the cycles

The role of the algorithm is to detect when the complexity of the reaction mixture has stopped increasing and, whenever that happens, to send a signal to the hardware control loop telling it to change the chemical inputs to a new random set. It receives the successive Mass Index values and stores them in a Python list. It takes two external parameters, the change threshold and the change interval. The threshold parameter specifies the critical value of the slope in the time dependency of the Mass Index below which the algorithm assumes that the values have plateaued. In the current work, this was set to a small positive value, 0.01. The change interval represents the minimum number of data points deemed to be sufficient for meaningful slope calculation. In our case, the slope was taken over 5 most recent points, as long as at least 10 data points have accumulated since either the start of the run or the last input switch.

Each time a new data point is detected and the corresponding m/z index measured, the algorithm first checks if the condition above is met – if it is not, it waits for the next data point. As soon as the 10th data point arrives, the slope is taken using simple linear regression against the vector [0, 1, 2, 3, 4]. When the slope is above the threshold specified above, the least recent data entry is removed from the list, replaced with the one just recorded and the algorithm waits for the next data point. For the slopes below the threshold, the DecisionMaker class sets the relevant boolean flag in the configuration file to

True. At the start of the subsequent cycle, when the hardware loop detects that flag, it proceeds to the next entry in its list of randomly generated chemical input sets.

## 5.4 Alternative algorithms tested

Based on the issues that have been highlighted, with the initial used m/z algorithm, alternative ways to evaluate the data were found. As one of the problems of the Mass Index, was the fact that there was no relation between the mass of the peak and its intensity, it was interesting to investigate how the data would change if the intensity would be multiplied by the mass of the corresponding peak.

### 5.4.1 Adaptive Mass Index

An adaptive formula was developed to check whether the original mass index was sensitive to 1) the hard threshold used, and 2) outliers at the higher and lower end of the spectrum resulting in spurious values for  $M_{\max}$  and  $M_{\min}$ . We have shown the results of this analysis applied to Run 10 in Figure 27. To address (1) we have counted peaks partially by using a sigmoid function centered on the threshold to assign weights to the peaks. This means that peaks with intensities well below the threshold (<1%) have weights closer to 0, and peaks well above the threshold (100x) are weighted effectively 1.0. Close to the weights assigned to the peaks move slowly between 1.0 (above the threshold) to 0.5 (at the threshold) then down to (0.0) well below the threshold. The mathematical form is:  $w(i) = 1.0 / (1 + \exp(-i + t))$ , where  $i$  is the intensity of the peak and  $t$  is the threshold. In place of counting the peaks ( $n_{\text{peaks}}$ ) we sum the weights for the peaks.

For (2) instead of taking the maximum mass and the minimum mass we take the top 5% and bottom 5%  $m/z$  values and average them to replace  $M_{\max}$  and  $M_{\min}$  respectively. This means that the maximum mass is not just an outlier but instead the end of the distribution of observed masses. Similarly for the minimum mass. We found that the numerical value of the mass index has changed but the general trends have not.

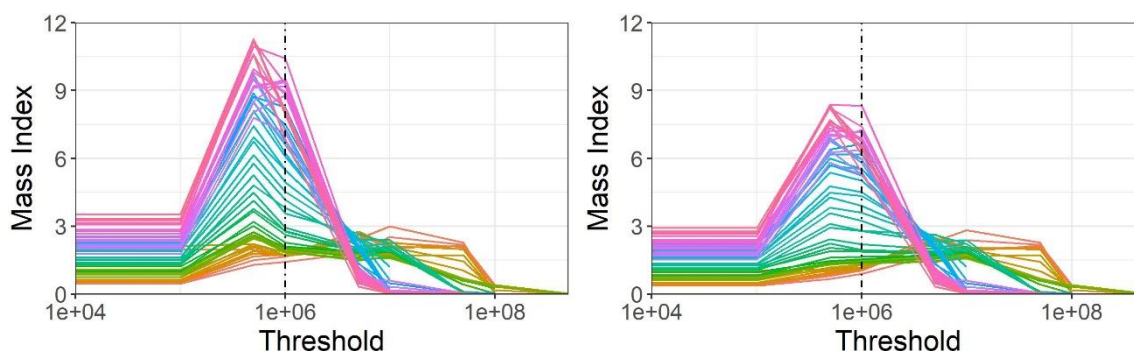

**Supplementary Figure 26:** Change in Mass Index based on noise filtering threshold. (Left) Here we show the Mass Index calculated for all the samples in Run 10 evaluated using different noise thresholds. Each line is one sample from Run 10. If the threshold is set too low, the mass index is dominated by

peaks from electrical noise. Which is removed around  $10^5$ - $10^6$ , resulting in the increase in the mass index (because the number of total peaks is greatly reduced by removing noise. Setting the threshold too high  $\sim 10^7$ , reduced the mass index by filtering true signal peaks. The different colours represent different samples while the black vertical dashed line indicates the threshold used during the experiments. (Right) the same analysis shown with the adaptive calculation in described in 5.4.1.

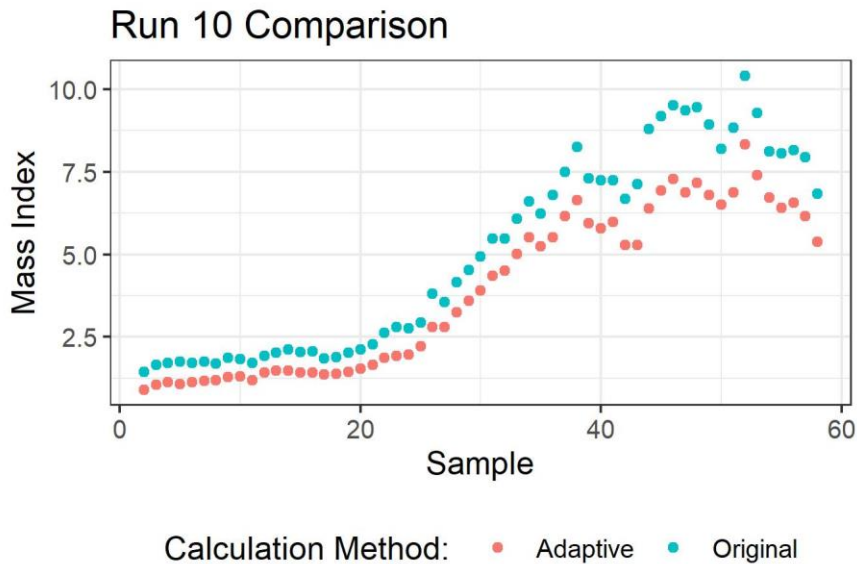

**Supplementary Figure 27:** Run 10 with adaptive and original mass index calculation

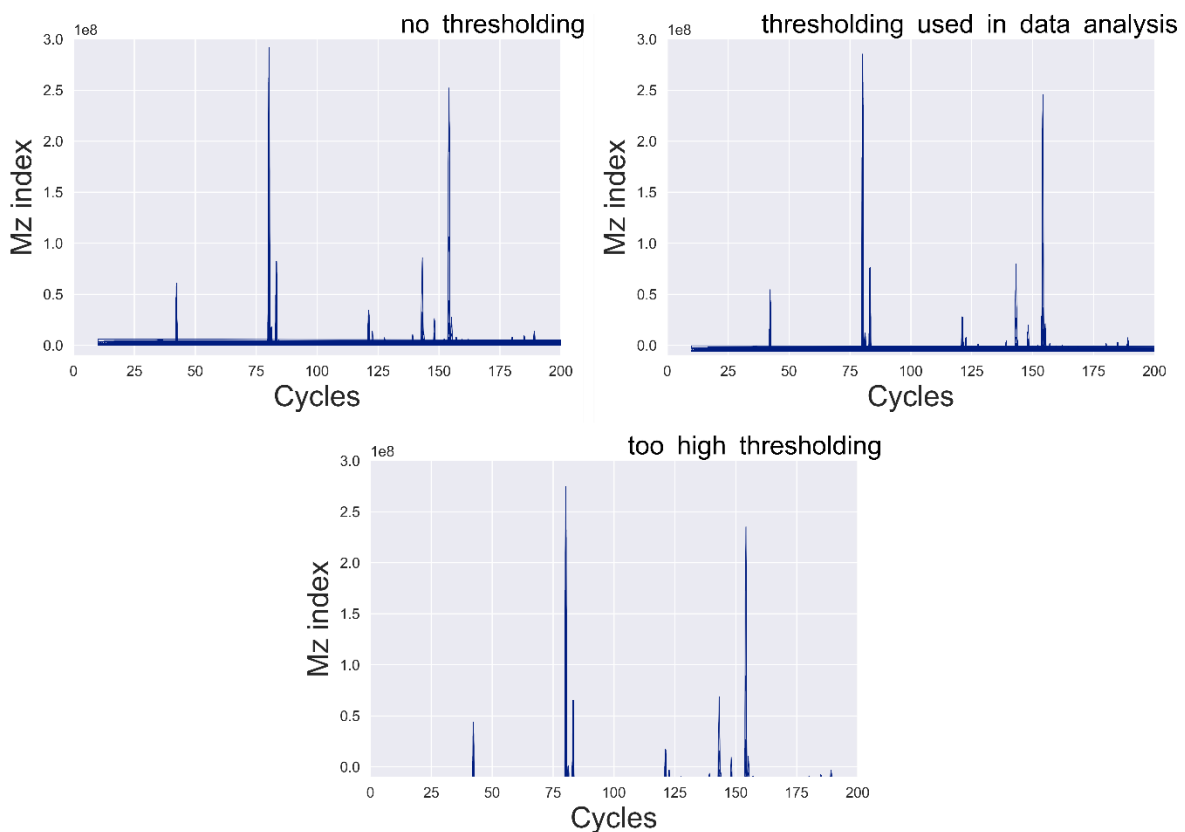

**Supplementary Figure 28:** Examples of thresholding tests for data analysis of offline samples. The top left shows no thresholding and the top right is the thresholding used in the data analysis. The

baseline is cleared up, while small peaks are still included. The bottom graph shows an example of too high thresholding, as baseline and small peaks are substantially cut off.

As these algorithms have been written post-data acquisition, thresholding was applied and adjusted directly to the experimental data. The best way for thresholding turned out to take the median of the intensities added to half of a standard deviation unit, see Supplementary Figure 29 and Supplementary Figure 28. This way of thresholding was chosen as it enables the code to capture every single peak of a spectrum, while filtering the lowest amount of small peaks over noise. This was important, as we wanted to take species into our calculation that are too low in abundance to be over a set threshold, but are different from starting material and noise. In the first part of the figure, all required libraries are imported. The function starts with reading the csv data into a data frame. In the second part of the function, the threshold of each intensity is calculated and added as a column to the dataframe. Dataframes are objects to store tabular data, specific for the data analysis toolkit Pandas, which can be used in Python. This thresholding strategy is used for every described code below.

```
import numpy as np
from numpy import array
from numpy import matrix
import pandas as pd
import matplotlib.pyplot as plt
%matplotlib inline

def get_df(df_file):
    #opens csv file and reads it in as a df
    my_df = pd.read_csv(df_file)
    list(my_df.columns.values)
    #set header right
    my_df.columns = ["rts", "mz", "int"]

    #adds another column to the dataframe with the intensity subtracted by our set threshold
    #our threshold is the average threshold with the standard deviation divided by two added
    threshold = ((my_df.loc[:, "int"].median() + (my_df.loc[:, "int"].std()) / 2)
    thresh_df = my_df["int"] - threshold
    #add thresholding column
    my_df["threshold"] = thresh_df
    my_df[my_df < 0] = 0

    #this adds a column to the dataframe where we multiply mz mass with the thresholded intensity
    mz = my_df["mz"]
    t_int = my_df["threshold"]
    multi = mz * t_int
    my_df["multi"] = multi
    return(my_df)
```

**Supplementary Figure 29:** First part of the modified Mass Index code. The first block shows the libraries imported, the function shown here opens a csv file and adds a column with the calculated threshold to the dataframe. In the last part the threshold column is multiplied with the mass

The last part of Supplementary Figure 29 shows how the mass is set in relation with the intensity of the peak. Another column “multi” is added to the data frame in which the mass of each peak is multiplied with the thresholded intensity of each peak. Instead of using just the mass value in the Mass Index before, we are looking for the heaviest and lowest peak and are saving the corresponding multiplied value of this particular peak into two separate list. After that, the number of peaks is determined for the

whole spectrum and this number is stored for each retention time group (representing the spectra in the dataframe) in an additional list. With these three lists, it is possible to calculate the modified Mass Index, see Supplementary Figure 30.

```
def mz_index_calculation(my_df):
    #this calculates the actual mz index value
    list_max_number = max_number(my_df)
    list_min_number = min_number(my_df)
    peak_count = peak_counter(my_df)

    #first subtract the minimum number from the maximum for every value in both lists
    a = matrix(list_max_number)
    b = matrix(list_min_number)
    sub = a - b
    #we convert the subtraction list into an array that we can divide later
    sub_array = array(sub)
    #turns peak count into an array
    peak_array = array(peak_count)
    #divides the subtracted min and max values through the number of peaks
    mz_list = np.divide(sub_array, peak_array)
    #takes the average of the total mz calculation
    mz_value = np.average(mz_list)
    return(mz_value)
```

**Supplementary Figure 30:** Function to calculate the modified Mass Index, using the python libraries numpy arrays and panda data frames

To compare both evaluation methods, the mass spec data from the inline-measured samples was rerun with the modified version of the Mass Index code (Supplementary Figure 30). The comparison is to be made carefully, as not just the relation between peaks and intensity is changed but on top of that, the thresholding. The values of the plotted data changed completely, so the comparison of these two data sets is limited to the observation of “data trends” and can be seen in Supplementary Figure 31.

## Mz index experimental

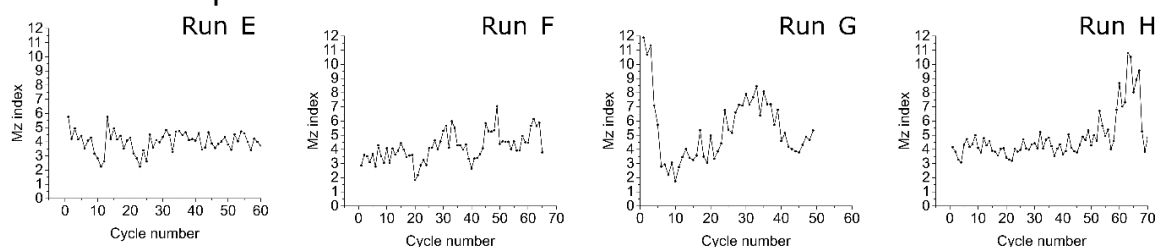

## Mz index modified

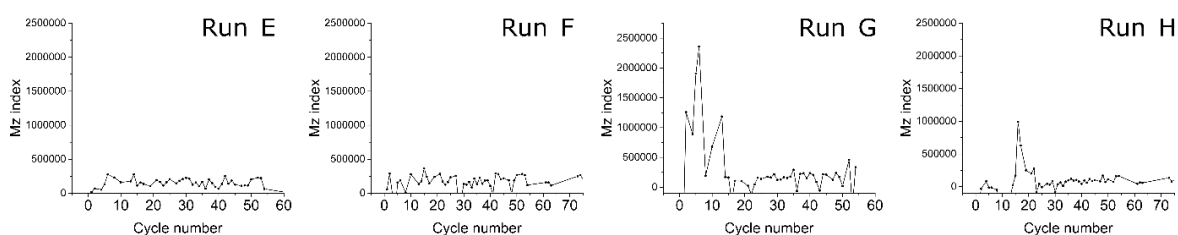

**Supplementary Figure 31:** Data evaluated with experimental Mass Index (mz index) and modified version, applied on same data

The plots presented in Supplementary Figure 31, do not show an immediate trend, which would be possible to observe. In general, the modified Mass Index seemed to have lowered the complexity or variation of specific cycles. In the experimental Mass Index comparison, all runs are in a similar scale, as when a similar scale is applied to the modified Mass Index, one run, run G stands out the most. This correlates with the experimental Mass Index, as the experimental Mass Index starts very high, until it drops around cycle 10. The modified Mass Index does has a rise in the beginning but the pattern of being high and dropping around cycle 10 can be observed in this case too. Run E and F are looking fairly similar in both calculations and run H seemed to be turned over its vertical axis as there is a rise visible at the end in the experimental Mass Index and with the modified version, a rise is possible to observe around cycle 20, which drops again afterwards. The algorithm would have clearly made different input choices than the experimental algorithm, but if this algorithm would make more sense than the mx index that was in use is questionable.

#### 5.4.2 Weight by intensity index

An evaluation method based on the weight and the intensity of each peak was developed. In this calculation, the aim is to get a number  $z$ , which is the sum of all intensities multiplied by their mass value over each spectrum.

$$z = \sum I_p * \frac{m}{z_p} .$$

When this value is high, the sample has a higher amount of larger products, with a stronger signal.

As just multiplying every value would lead to very high numbers, the intensity is normalised before multiplied with the mass value (Supplementary Figure 32), similar to the multiplication step in the calculation for the modified Mass Index (Supplementary Figure 29).

```

def normalise(my_df):
    #we are iterating through every retention time group
    unique_rts = sorted(list(set(my_df["rts"])))
    n_rt = len(unique_rts)
    #add another line into our df with normalised intensities ip, currently just with zeros stored
    my_df["normed_I"] = np.zeros(len(my_df["int"]))
    #want to get intensities for each spectra normalized by the total intensity for that spectra
    #(e.g. the total intensity for each rt should be = 1)
    for i in range(n_rt):
        #iterates through every retention time group
        rt_df = my_df[my_df["rts"]==unique_rts[i]]
        #sums up all intensities in a rt group
        T = sum(rt_df["int"])
        #divides the sum of all intensities T through each intensity in our df
        rt_df.loc[:, "normed_I"] = rt_df.loc[:, "int"]/T
        #adds or rt_df into our main df as our normed_I column
        my_df[my_df["rts"]==unique_rts[i]] = rt_df
    return(my_df)

def multiply(my_df):
    # add multiplied mz with threshold intensity
    mz = my_df["mz"]
    int_norm = my_df["normed_I"]

    multi_normed = mz * int_norm
    my_df["multi_normed"] = multi_normed
    return(my_df)

def sum_it_up(my_df):
    #sums the multi column and returns the multi sum
    total_sum = my_df["multi_normed"].sum()
    print(total_sum)
    return(total_sum)

```

### Supplementary Figure 32: Functions for the calculation of the normalised mass over intensity value

In the last part of Supplementary Figure 32, the sum of all normed and multiplied values of the cycle is taken and saved to a list. The experimental inline Advion data is rerun with the new calculation and the data is presented in Supplementary Figure 33. In this figure, the weight by intensity value of run E to H is shown. As all of these runs have different input sets, there is not much to compare in between these runs but when the data is compared with the previous algorithms in Supplementary Figure 31, some differences are visible. As these are different calculations, the values on the y-axis on every plot are incomparable, therefore is the comparison limited to a description of the shape based on the cycle number.

Interestingly run E differs the most from the previous calculated Mass Index values. The weight by intensity values are compared to the other plots calculated with the same algorithm much higher, which leads to an elevation of the whole graph in the plot while the values are in the same data range as all other calculated values in data compared with the Mass Index in Supplementary Figure 31. Run F looks similar as in the modified Mass Index. While the experimental Mass Index has a clear rise between cycle 30 to 40 and again at approximately, cycle 50. The weight by intensity calculated values and the modified Mass Index values have several small peaks but no clear rise throughout the run. The weight by intensity run G is more similar to the experimental Mass Index calculation, showing a rise right in the

beginning, but the rise later in the experimental Mass Index calculation, visible in Supplementary Figure 31 is not observable in the values shown in Supplementary Figure 33.

Run H differs significant from the Mass Index calculations. There is no massive peak observable, but the values show a rise around cycle 30, which is not visible in the data previously calculated. An overlap with the experimental Mass Index is that another peak between cycle 60 and 70 is visible, which is a very distinct peak in the graph of the experimental Mass Index of run H shown in Supplementary Figure 31.

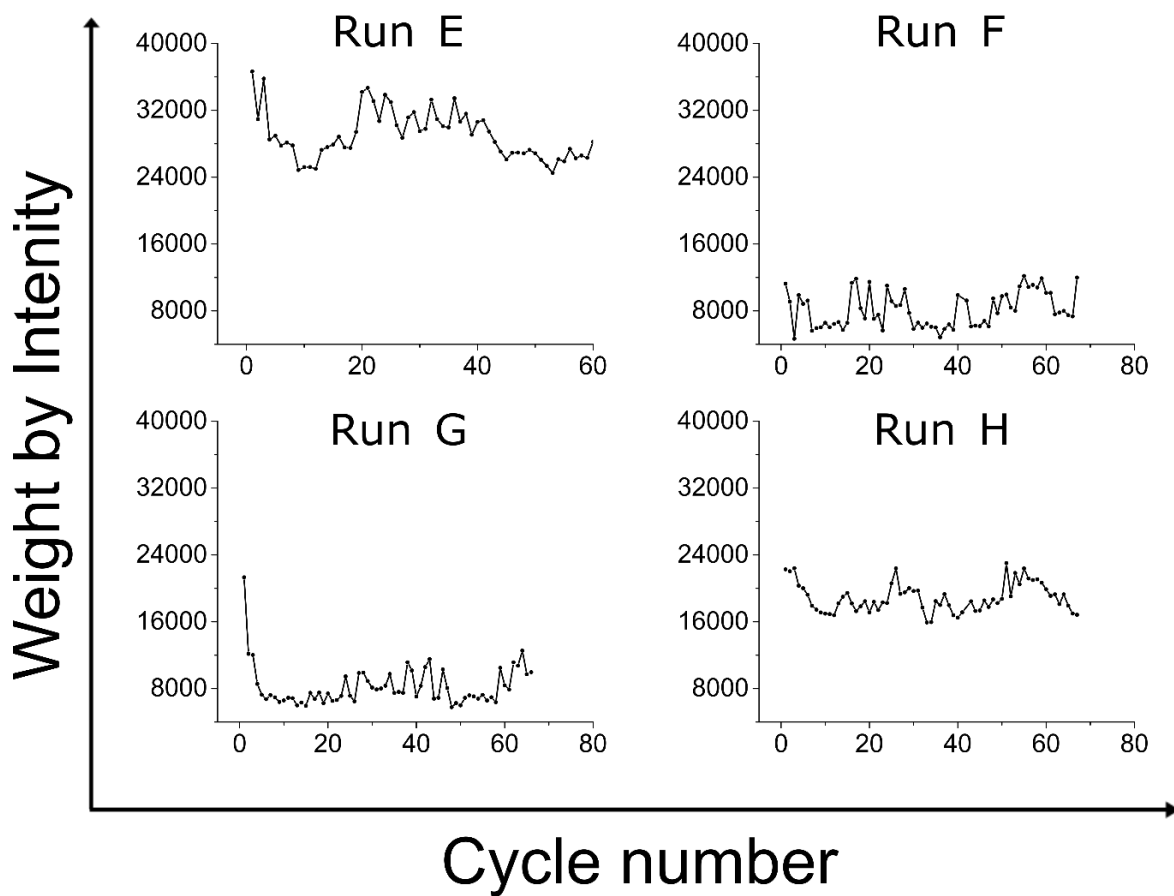

**Supplementary Figure 33:** Data evaluated with the weight by intensity calculation.

### 5.4.3 Information entropy value

In this approach, a code is developed to compare the cycles of a run based on their information entropy. Entropy is often defined as a value for the disorder of a system, but in this case, it is used to describe the information content in our system (2). The information entropy of a spectrum is defined as:

$$S = - \sum_p i_p * \ln(i_p).$$



Where  $i_p = \frac{I_p}{T}$ , and  $T = \sum_p I_p$ ,  $i_p$  is the intensity of peak  $p$  normalized to the total intensity of the spectra. This leads to a value which will be lower when the sample has fewer, larger peaks and higher when the sample has many peaks of comparable size. The code starts in a similar manner to the previous ones by transferring the data into a pandas dataframe and setting the threshold for each intensity value. The intensity values are being normalised but this time not multiplied with the mass values. How the entropy value is calculated is shown in Supplementary Figure 34.

```
def calculate_entropy(my_df):
    #we are iterating through every retention time group
    unique_rts = sorted(list(set(my_df["rts"])))
    n_rt = len(unique_rts)
    #this adds a column to the dataframe that has the ln of ip stored
    my_df["log_ip"] = np.log(my_df["normed_I"])
    #this adds a column that has the ln of ip multiplied to ip stored
    my_df["entropy"] = my_df["log_ip"] * my_df["normed_I"]
    #create an empty list
    entropy = []
    #we are iterating through every retention time group again
    unique_rts = sorted(list(set(my_df["rts"])))
    n_rt = len(unique_rts)
    for i in range(n_rt):
        #iterates through every retention time group
        rt_df = my_df[my_df["rts"]==unique_rts[i]]
        #sums up the entropy for a spectra by summing it up for a retention time group and
        #stores it into our entropy list
        S = sum(rt_df["entropy"])
        entropy.append(S)
    #takes the average of the entropy of all spectras
    total = statistics.mean(entropy)
    print(total)
    return(total)
```

**Supplementary Figure 34:** Function to calculate the entropy value of Advion data

This function iterates through each retention time group and adds a column of the natural logarithm of each individual normed intensity to the data frame. This value is then multiplied with the value of the normed intensity. As the value desired is the entropy over a full spectrum, the code iterates through the data frame again, summing up all entropy values for each individual retention time group, resolving in the entropy value for each individual spectra. To generate a through the run comparable number, the average of the entropy of all spectra is taken and returned as entropy value for the individual cycle. The resulting data is shown in Supplementary Figure 35.

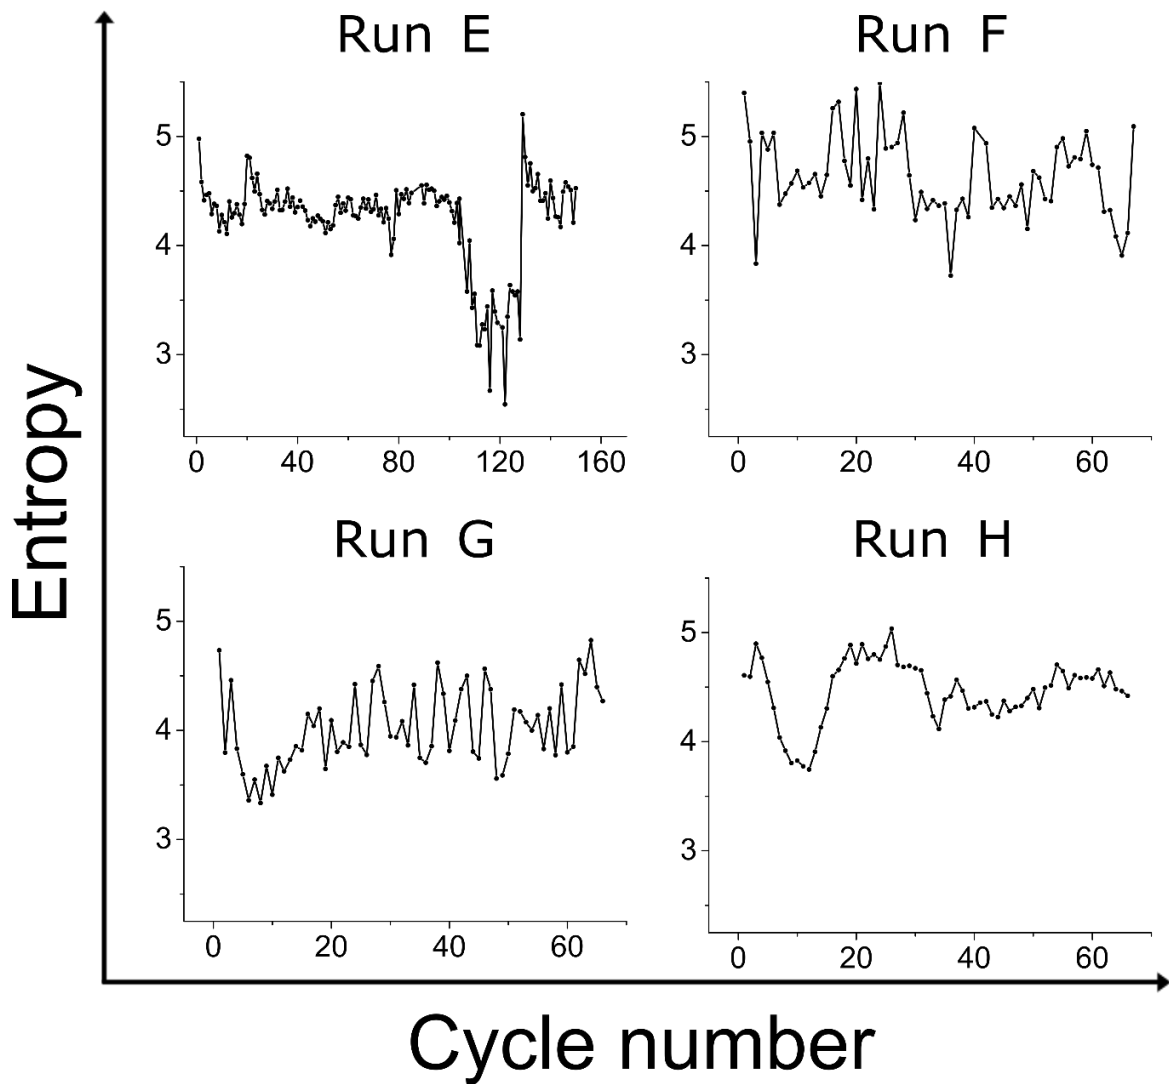

**Supplementary Figure 35:** Data evaluated with the information entropy measure

As before, the data will be compared with the Mass Index used in the experiment, as this was the code of which the input decisions have been based on. The graph for the entropy in run E in Supplementary Figure 35 is moderate throughout the first 100 cycles and declines steep after that until it rises again around cycle 130 to cycle 150. The graph has no similarities to the Mass Index calculates graph in Supplementary Figure 31 though.

Different to the entropy graph of run F that follows approximately a similar pattern than the graph of the Mass Index calculation but looks almost random. Both figures show a quite disorganised pattern but both plots rise between cycle 20 and 40. The run G plots differ heavily from each other. The Mass Index graph in Supplementary Figure 31 is high in the beginning, descends until cycle 10 and follows a curve after that. The information entropy graph in Supplementary Figure 35 of run G shows random distribution of points and the value is going rapidly up and down between cycles. Run H is different, as the entropy plot declines until cycle 10, rises after that until it reaches cycle 20 to cycle 55, where it

starts to follow another more moderate curve. The Mass Index plot of run H in Supplementary Figure 31 shows a moderate course until the index rises rapidly after cycle 60.

If we compare the algorithmically produced data of each run individually, we will compare the modified Mass Index, the weight by intensity and the information entropy as the same thresholding strategy was used in all 3 calculations. It turns out, the different algorithms give almost complimentary information about the individual runs. While run E has the highest weight by intensity value in comparison with the other 3 runs, which leads to the idea that this run has many product species of high mass value and high abundance, the information entropy of this run shows a drop around cycle 120. This means that in this range of cycles, rather than having a high amount of many product species we got a few very large peaks, which is plausible based on the weight by intensity value, as this value cannot distinguish between a high amount of peaks and a few intense peaks, in opposite to the information entropy value. On the same side, when considering the Mass Index, it suggests a number of larger peaks as if there would just be one dominant peak, this value would be high too. For run F, the weight by intensity index is relatively low throughout the run, this would lead to the idea, that there was a lower amount of species and the overall abundance of the signal was lower too. This explains the high information entropy, as it suggests many peaks of comparable size, which do not contradict the weight by intensity value. The Mass Index of run F is low, which shows that there is no dominant species of high mass, but rather a higher amount of peaks of lower abundance. The interpretation of run G appears more complex. The Mass Index value shows a high rise in the beginning of a run, suggesting an abundant dominant species in the beginning, which breaks down throughout the run. This can be further validated by the weight by intensity value, as this value shows a rise in the begin of the run. The information entropy, shows a drop in the same area, suggesting a fewer number of peaks but not such a clear trend as when calculated with the other two values. Run H shows a peak in the area between cycle 10 and 20, which suggests the build-up of a few species of higher mass, which break down into more species afterwards. This rise is not clear to read in the weight by intensity value as this value shows a small rise at that point but a more dramatic rise later in the run, in which the m/z value does not show a rise. On the other hand, the information entropy shows a drop, suggesting that there are rather few larger species, like the Mass Index suggested. It is interesting to see that observations based on the different algorithms can, if handled carefully, build on each other. On the other it is important to state, that the algorithms alone are just able to give ideas of the product distribution in a sample and if a cycle contains dominant product species. For more information about the exact chemical composition and the reactions, which did occur in the system, a more extensive analysis is necessary.

## 6 Supplementary References

1. D. Doran, Y. M. Abul-Haija, L. Cronin, Emergence of Function and Selection from Recursively Programmed Polymerisation Reactions in Mineral Environments. *Angewandte Chemie International Edition* **58**, 11253-11256 (2019).
2. S. Vajda, C. E. Shannon, W. Weaver, The Mathematical Theory of Communication. *The Mathematical Gazette* **34**, (1950).
